# Supplementary material for: Extraction and untargeted analysis of metabolome from undemineralised cortical bone matrix
Source: Royal Society of Chemistry journal article supplement (doi:10.1039/d4mo00015c), 2024-07-22
Supplement: d4mo00015c1.pdf [file d4mo00015c1.pdf]

**Table S1.** Variable parameters for each of the LC-MS acquisition methods used.

| Method                             | HILIC positive                                                                                             | HILIC negative                                                                                                  | Reverse phase positive                                                                | Reverse phase negative          |
|------------------------------------|------------------------------------------------------------------------------------------------------------|-----------------------------------------------------------------------------------------------------------------|---------------------------------------------------------------------------------------|---------------------------------|
| Column                             | Agilent Poroshell 120 HILIC-Z PEEK-lined column, 150 mm length, 2.1 mm diameter, 2.7 $\mu$ m particle size |                                                                                                                 | Thermo Accucore C18 column, 150 mm length, 2.1 mm diameter, 2.6 $\mu$ m particle size |                                 |
| Mobile phase A                     | 10 mM ammonium formate and 0.1 % formic acid in water                                                      | 10 mM ammonium acetate, pH 9 with ammonium hydroxide and 10 $\mu$ M medronic acid                               | 0.1 % formic acid in water                                                            |                                 |
| Mobile phase B                     | 9:1 acetonitrile / 10 mM ammonium formate and 0.1 % formic acid in water                                   | 85:15 acetonitrile / 10 mM ammonium acetate, pH 9 with ammonium hydroxide and 10 $\mu$ M medronic acid in water | 0.1 % formic acid in 98:2 acetonitrile / water                                        |                                 |
| Solvent flow rate                  | 0.25 ml/min                                                                                                |                                                                                                                 | 0.3 ml/min                                                                            |                                 |
| Column temperature                 | 50 °C                                                                                                      |                                                                                                                 | 40 °C                                                                                 |                                 |
| Needle wash composition            | 9:1 acetonitrile / water                                                                                   |                                                                                                                 | 5:95 acetonitrile / water                                                             |                                 |
| Gradient, %B                       | 0 min 98 %B<br>3 min 98 %B<br>23 min 5 %B<br>24 min 5 %B<br>24 min 98 %B                                   | 0 min 96 %B<br>2 min 96 %B<br>22 min 65 %B<br>24 min 65 %B<br>24 min 96 %B                                      | 0 min 5 %B<br>1 min 5 %B<br>8 min 100 %B<br>10 min 100 %B<br>10 min 5 %B              |                                 |
| Re-equilibration time              | 5 min                                                                                                      |                                                                                                                 | 4 min                                                                                 |                                 |
| Total run time                     | 30 min                                                                                                     |                                                                                                                 | 15 min                                                                                |                                 |
| Mass spectrometer polarity         | Positive                                                                                                   | Negative                                                                                                        | Positive                                                                              | Negative                        |
| Ionspray voltage                   | 5500 V                                                                                                     | -4500 V                                                                                                         | 5500 V                                                                                | -4500 V                         |
| Scan range ( <i>m/z</i> )          | 50 – 1000                                                                                                  | 60 – 1600                                                                                                       | 50 – 1000                                                                             | 60 – 1600                       |
| Adducts for peak picking           | M+H, M+Na, M+K, M+H-H <sub>2</sub> O, M+2H                                                                 | M-H, M-H-H <sub>2</sub> O, M+Cl                                                                                 | M+H, M+Na, M+K, M+H-H <sub>2</sub> O, M+2H                                            | M-H, M-H-H <sub>2</sub> O, M+Cl |
| Peak picking retention time limits | 1.3 – 24 min                                                                                               |                                                                                                                 | 0.9 – 10 min                                                                          |                                 |

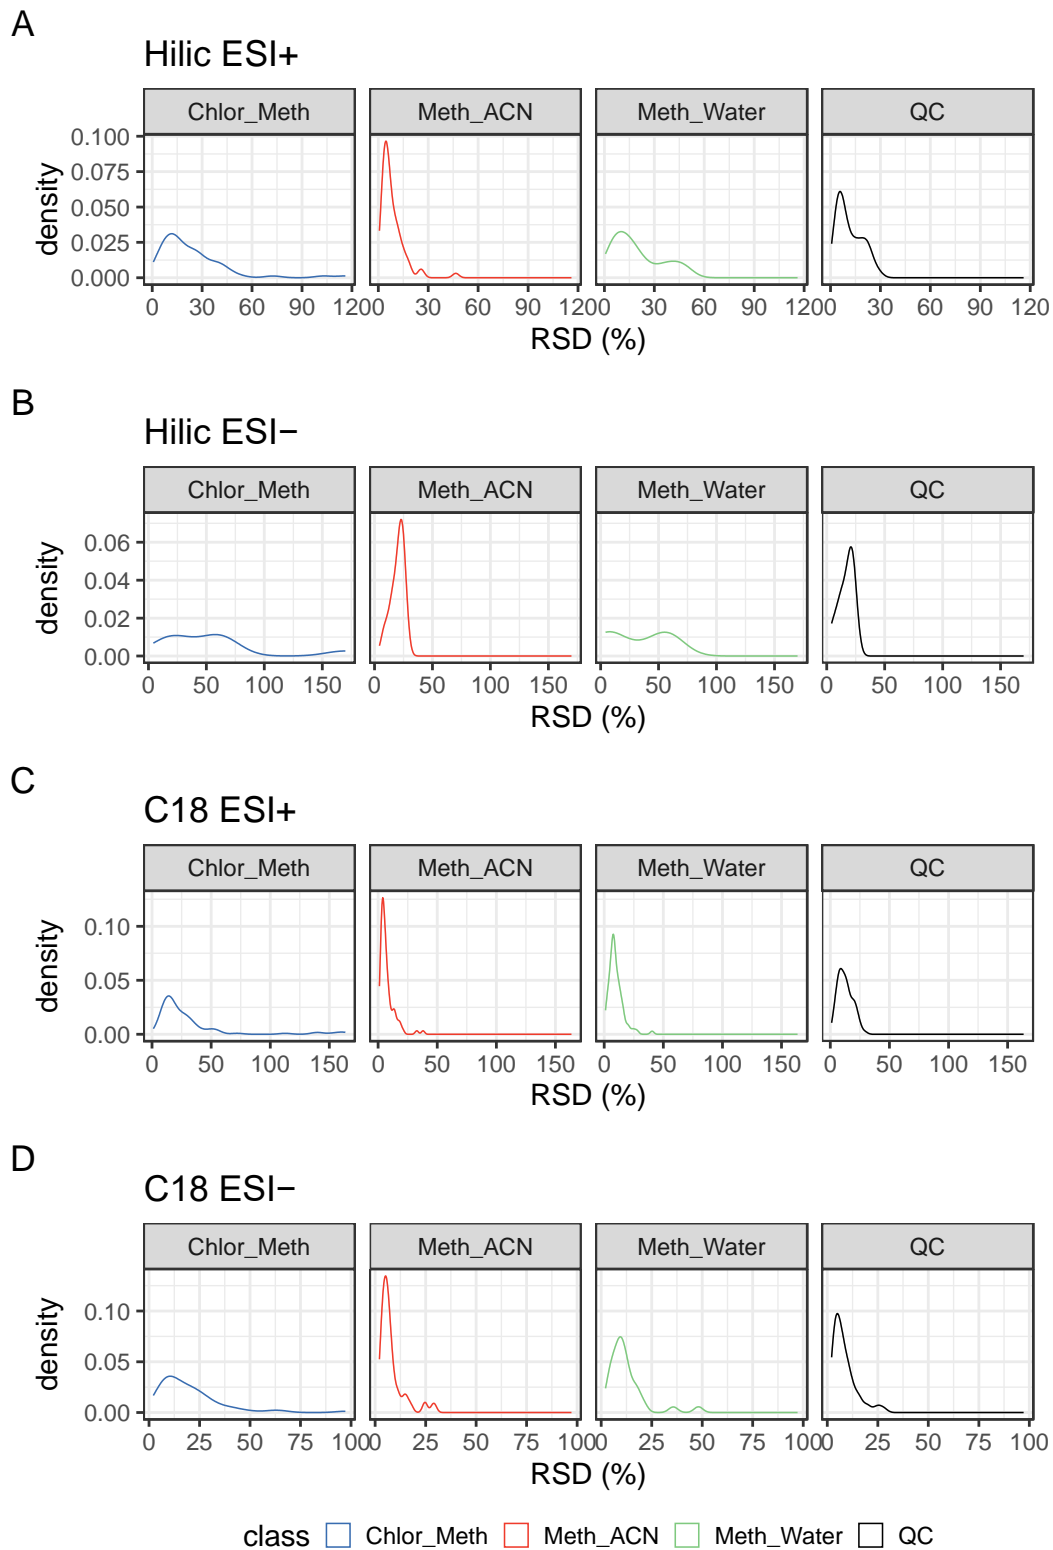

5 **Figure S1.** Density plot for all metabolites RSD values across the four experiments and divided by extraction protocol to evaluate extraction reproducibility. The figure also shows RSD for the QC samples to assess injection replicability.

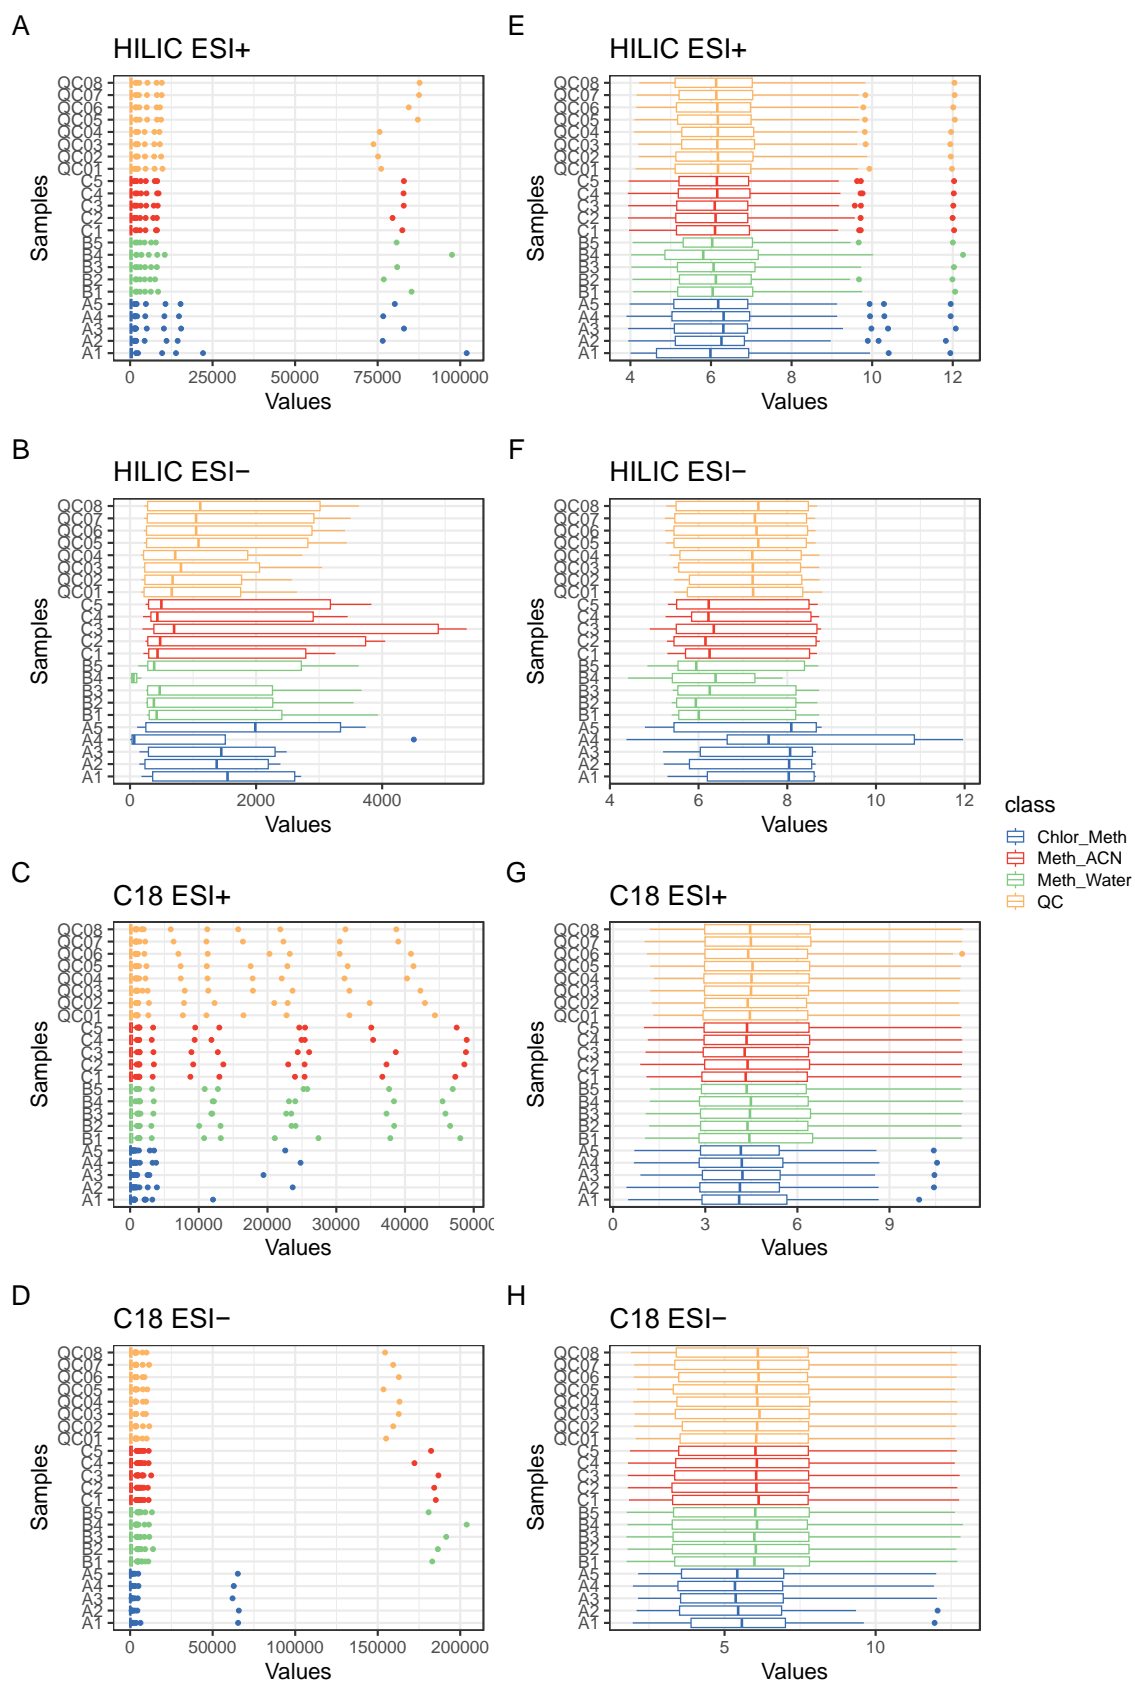

10

**Figure S2.** Results for data processing. (A-D) Boxplots of all samples and QCs for the four assays prior to transformation and normalisation. (E-H) Boxplots of all samples and QCs for the four assays after transformation and normalisation.

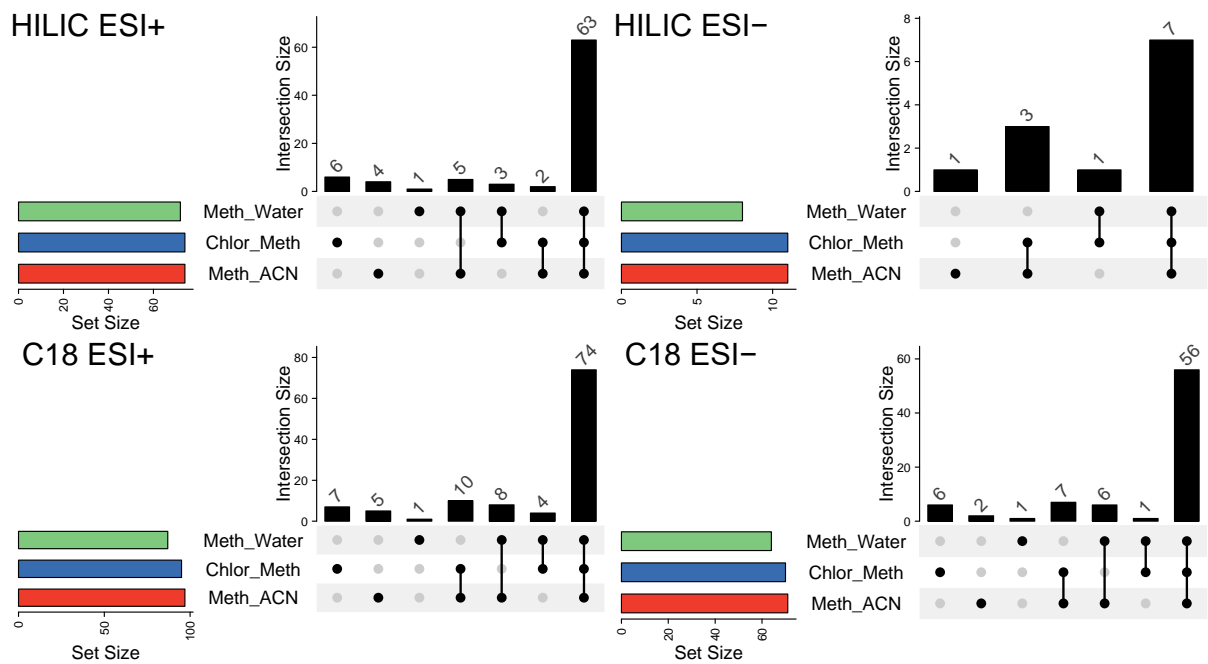

15 **Figure S3.** UpsetR plot showing the intersection of compounds across the three extractions for all assays considered in the study. Data were processed separately for each extraction protocol.
