# Supplementary material for: Extraction and untargeted analysis of metabolome from undemineralised cortical bone matrix
Source: Royal Society of Chemistry journal article supplement (doi:10.1039/d4mo00015c), 2024-07-22
Supplement: d4mo00015c2.xlsx [file d4mo00015c2.xlsx]

## Sheet: HILIC ESI+ Standrds
Compound Id	Retention Time (min)	Neutral Mass
1-aminocyclopropanecarboxylate	3.36	101.048
1-methyladenosine	2.86	281.112
1-methyl-l-histidine	10.35	169.085
2,4-dihydroxypteridine	2.56	164.033
2-aminophenol	2.18	109.053
2-hydroxypyridine	2.57	95.0371
2-quinolinecarboxylate	2.79	173.048
3,5-diiodo-l-thyronine	3.8	524.893
3,5-diiodo-l-tyrosine	4.58	432.867
3-methoxytyramine	4.55	167.095
3-methyladenine	3.6	147.068
3-methylhistamine	11.71	125.095
3-nitro-l-tyrosine	5.42	226.059
4-acetamidobutanoate	2.68	145.074
4-coumarate	2.42	164.047
4-guanidinobutanoate	7.64	164.047
4-imidazoleacetate	8.77	126.043
4-pyridoxate	2.84	183.053
4-quinolinecarboxylate	4.01	173.048
5,6 dimethylbenzimidazole	2.3	146.084
5-aminopentanoate	7.71	117.079
5-hydroxyindoleacetate	2.57	191.058
5-hydroxylysine	13.13	162.1
5-hydroxytryptophan	8.87	220.085
5-methylcytosine	3.81	125.059
adenine	2.6	135.054
adenosine	3.28	267.097
adenosine 2',3'-cyclic phosphate	7.76	329.053
adenosine 3',5'-diphosphate	12.35	427.029
adenosine diphosphate ribose	12.53	559.072
agmatine	12.14	130.122
aicar	11.13	338.063
aminoadipate	10.62	161.069
anserine	12.54	240.122
arginine	12.38	174.112
arginine 13c6 istd	12.38	180.132
ascorbate	4.54	176.032
asparagine	10.28	132.054
aspartate	11.45	133.037
beta-alanine	9.9	89.0477
betaine	7.13	117.079
beta-nicotinamide adenine dinucleotide	12.01	663.109
bilirubin	1.92	584.264
biliverdin	2.06	582.248
biotin	2.61	244.088
bis-tris	6.9	209.126
cadaverine	12.35	102.116
carnosine	12.55	226.107
choline	5.04	104.108
cis-4-hydroxy-d-proline	9.68	131.058
citicoline	12.63	488.107
citrulline	10.82	175.096
cortexolone	2.06	346.214
cortisol	2.17	362.209
cortisol 21-acetate	2.02	404.22
cortisone	2.13	360.194
cortisone d8 istd	1.96	368.244
creatine	9.58	131.07
creatinine	2.22	113.059
cyclic amp	11.62	329.053
cyclic gmp	10.19	345.047
cystathionine	11.94	222.067
cysteine	8.4	121.02
cystine	12.33	240.024
cytidine	4.85	243.085
cytidine 2',3'-cyclic phosphate	10.21	305.041
cytosine	4.26	111.043
d-alanine	9.31	89.0477
deoxyadenosine	2.98	251.102
deoxyadenosine monophosphate	10.32	331.068
deoxycarnitine	6.36	145.11
deoxycorticosterone acetate	1.94	372.23
deoxycytidine	4.26	227.091
deoxycytidine monophosphate	11.19	307.057
deoxyguanosine	4.55	267.097
dethiobiotin	2.43	214.132
didecanoyl-glycerophosphocholine	2.4	565.374
dihydrobiopterin	5.36	239.102
d-ornithine	12.78	132.09
estradiol d5 istd	1.87	277.209
fad	11.44	785.157
ferulate	2.21	194.058
gamma-aminobutyrate	9.08	103.063
glucosamine	10.88	179.079
glutamate	10.45	147.053
glutamine	9.75	146.069
glutarylcarnitine	7.96	275.137
glutathione reduced	10.83	307.083
glycine	9.61	75.032
guanidinosuccinate	11.23	175.059
guanine	4.71	151.049
guanosine	5.37	283.092
guanosine monophosphate	11.72	363.058
hippurate	3.07	179.058
histamine	10.48	111.08
histidine	11.5	155.07
histidinol	10.5	141.09
homocysteine	7.61	135.035
homocystine	11.81	268.055
hypotaurine	9.57	109.02
hypoxanthine	3.32	136.038
indole-3-acetamide	2.27	174.079
indole-3-acetate	5.85	175.063
indole-3-pyruvate	1.92	203.058
inosine	4.13	268.081
inosine monophosphate	11.14	348.047
isoleucine	6.34	131.095
kynurenate	4.38	189.043
kynurenine	5.76	208.085
l-alanine	9.31	89.0477
lauroylcarnitine	2.81	343.272
l-carnitine	8.18	161.105
leucine	5.87	131.095
liothyronine	3.56	650.79
lipoamide	2.11	205.06
l-ornithine	12.78	132.09
l-tryptophanamide	5.09	203.106
lumichrome	2.19	242.08
lysine	12.63	146.106
lysine 13c6 15n2 istd	12.63	154.12
mannitol	5.41	182.078
melatonin	2.13	232.121
methionine	7.07	149.051
methionine sulfoximine	10.5	180.057
methyl 4-aminobutyrate	4.56	117.079
methylthioadenosine	1.86	297.089
n,n,n-trimethyllysine	12.01	188.153
n1-acetylspermine	16.77	244.226
n-acetylasparagine	7.83	174.064
n-acetylaspartate	6.26	175.048
n-acetylcysteine	3.94	163.03
n-acetylgalactosamine	4.75	221.09
n-acetylglucosamine	4.81	221.09
n-acetylglutamate	6.67	189.064
n-acetylleucine	2.57	173.105
n-acetylmethionine	3.06	191.062
n-acetylphenylalanine	2.78	207.089
n-acetylproline	3.8	157.074
n-acetylputrescine	7.52	130.111
n-acetylserotonin	2.35	218.106
n-formyl-l-methionine	3.39	177.046
nicotinamide	2.42	122.048
nicotinamide hypoxanthine dinucleotide	12.31	664.093
nicotinamide mononucleotide	11.28	334.057
nicotinate	3.66	123.032
nicotine	4.63	162.115
n-methyltryptamine	3.47	174.116
norleucine	5.49	131.095
norvaline	6.94	117.079
ophthalmate	11.28	289.127
o-succinyl-homoserine	9.8	219.074
oxoproline	6.02	129.043
palmitoylcarnitine	2.46	399.335
pantothenate	2.95	219.111
paraxanthine	2.35	180.065
phenylalanine	5.42	165.079
phosphorylcholine	11.3	183.066
pipecolate	7.36	129.079
p-octopamine	6.2	153.079
proline	7.85	115.063
protoporphyrin	3.08	562.258
pterin	3.44	163.049
purine	2.72	120.044
pyridoxamine	9.36	168.09
pyridoxine	3.07	169.074
pyroglutamate	6.04	129.043
s-adenosylhomocysteine	9.81	384.122
s-adenosylmethionine	12.36	398.137
salsolinol	5.4	179.095
sarcosine	8.96	89.0477
s-carboxymethylcysteine	11.15	179.025
sebacate	2.11	202.12
selenocystamine	11.86	247.933
selenomethionine	6.31	196.995
serine	9.66	105.043
serotonin	5.81	176.095
sphinganine	3.02	301.298
succinate	3.32	118.027
theobromine	2.38	180.065
theophylline	2.34	180.065
thiamine monophosphate	11.52	344.071
thiopurine s-methylether	2.3	166.031
threonine	9.21	119.058
thymidine-monophosphate	9.7	322.057
thymine	2.98	126.043
thyrotropin releasing hormone	8.08	362.17
trans-4-hydroxy-l-proline	9.4	131.058
trigonelline	6.33	137.048
tryptamine	3.96	160.1
tryptophan	6.33	204.09
tyramine	4.8	137.084
tyrosine	8	181.074
ureidopropionate	3.87	132.054
uridine monophosphate	10.51	324.036
urocanate	3.27	138.043
valine	7.25	117.079
xanthosine	4.48	284.076
xanthosine-monophosphate	11.42	364.042
xanthurenate	5.25	205.037

## Sheet: HILIC ESI- Standards
Compound Id	Retention Time (min)	Neutral Mass
(2-aminoethyl)phosphonate	1.1	125.023
1-hydroxy-2-naphthoate	6.83	188.049
1-methyladenosine	1.27	281.112
2,3-dihydroxybenzoate	3.02	154.027
2',4'-dihydroxyacetophenone	4.84	152.049
2,4-dihydroxypteridine	1.25	164.033
2,5-dihydroxybenzoate	2.24	154.027
25-hydroxycholesterol	8.45	402.35
2-aminoisobutyrate	1.08	103.063
2-quinolinecarboxylate	2.27	173.05
3,4-dihydroxybenzoate	1.23	154.026
3,5-diiodo-l-thyronine	5.57	524.903
3,5-diiodo-l-tyrosine	3.63	432.867
3-amino-5-hydroxybenzoate	1.22	153.042
3-hydroxyanthranilate	1.68	153.044
3-hydroxyphenylacetate	5.72	152.047
3-methoxytyramine	1.25	167.096
3-methoxytyrosine	1.25	211.084
3-methyl-2-oxindole	4.94	147.07
3-sulfinoalanine	1.11	153.008
4-coumarate	4.18	164.049
4-hydroxybenzaldehyde	3.14	122.037
4-hydroxybenzoate	2.16	138.032
4-imidazoleacetate	1.07	126.043
4-pyridoxate	1.33	183.053
4-quinolinecarboxylate	1.28	173.05
5,6 dimethylbenzimidazole	3.41	146.084
5-aminolevulinate	1.04	131.057
5-aminopentanoate	1.06	117.078
5-hydroxyindoleacetate	2.28	191.061
5-methylcytosine	1.07	125.059
adenine	1.63	135.054
aicar	1.13	338.06
aldosterone	5.57	360.194
allantoin	1.08	158.044
allopregnanetrione	7.05	330.219
alpha-tocopherol	9.08	430.381
androstenedione	6.94	286.193
aniline-2-sulfonate	1.34	173.014
anserine	1.03	240.121
asparagine	1.08	132.053
azelate	5.22	188.107
benzaldehyde	6.61	106.042
beta-nicotinamide adenine dinucleotide	1.53	663.103
biliverdin	6.82	582.245
biotin	3.7	244.092
bis(2-ethylhexyl)phthalate	10.37	390.277
caffeate	2.89	180.042
carnosine	1.03	226.106
cdp-ethanolamine	1.18	446.057
citicoline	1.7	488.105
citrulline	1.07	175.095
cortexolone	6.41	346.214
corticosterone	6.26	346.214
cortisol	5.86	362.209
cortisol 21-acetate	6.54	404.22
cyclic gmp	1.22	345.045
cystathionine	1.06	222.066
cytidine	1.06	243.084
cytosine	1.05	111.043
d4-hydroxychloroquine istd	2.76	339.201
deoxyadenosine	1.23	251.102
deoxycarnitine	1.11	145.11
deoxycorticosterone acetate	7.58	372.23
deoxycytidine	1.07	227.089
deoxycytidine monophosphate	1.14	307.055
deoxyguanosine	1.23	267.096
desmosterol	9.76	384.339
dethiobiotin	4.5	214.132
diaminopimelate	1.06	190.095
dopamine	1.22	153.078
epinephrine	1.07	183.088
epitestosterone	7.05	288.209
estradiol-17alpha	6.78	272.178
estrone	6.85	270.162
etiocholanone	7.4	290.225
filgotinib	5.28	425.152
galactosamine	1.03	179.078
genistein	6	270.052
genistein d4 istd	5.93	274.077
glucosamine	1.03	179.078
glucosamine 6-phosphate	1.06	259.045
glutamate	1.07	147.052
glutamine	1.07	146.068
glutarylcarnitine	1.25	275.137
glycochenodeoxycholate	7.11	449.314
glycocholate	6.59	465.31
guanine	1.2	151.049
hippurate	2.71	179.06
homocysteine thiolactone	1.07	117.024
hydroxychloroquine	2.76	335.176
indole	6.14	117.058
indole 3-acetamide	3.96	174.079
tryptophol	5.17	161.084
indole-3-acetate	5.19	175.065
indole-3-acrylate	5.63	187.063
indole-3-carboxaldehyde	4.93	145.052
indole-3-lactate	4.72	205.074
indole-3-methyl acetate	6.28	189.079
indole-3-propionate	5.76	189.078
indole-3-pyruvate	4.69	203.058
indoleacetaldehyde	4.72	159.069
isoleucine	1.22	131.094
kynurenine	1.3	208.084
lauroylcarnitine	7.34	343.272
leucine	1.25	131.094
liothyronine	6.12	650.79
lipoamide	5.54	205.062
lumichrome	5.19	242.079
melatonin	5.16	232.121
methyl jasmonate	7.11	224.141
methyl vanillate	5.31	182.058
methylguanidine	1.07	73.064
n6-(delta2-isopentenyl)-adenine	3.96	203.117
n-acetylasparagine	1.15	174.063
n-acetylglutamate	1.22	189.063
n-acetylglycine	1.21	117.042
n-acetylmethionine	2.02	191.061
n-acetylneuraminate	1.11	309.105
n-acetylproline	1.53	157.073
n-acetylputrescine	1.07	130.11
n-acetylserine	1.17	147.053
n-formyl-l-methionine	1.81	177.044
n-methylaspartate	1.1	147.052
omega hydroxydodecanoate	1.39	216.173
ophthalmate	1.22	289.126
ox07417	6.47	369.108
palmitoylcarnitine	8.56	399.335
pantothenate	1.42	219.111
phosphorylcholine	1.24	183.065
progesterone	7.71	314.225
pyridoxal-phosphate	1.22	247.023
quinoline	1.51	129.058
s-adenosylhomocysteine	1.21	384.121
s-adenosylmethionine	1.02	398.135
salsolinol	1.22	179.097
s-carboxymethylcysteine	1.1	179.024
sebacate	5.73	202.123
selenomethionine	1.23	196.995
serine	1.06	105.042
serotonin	5.14	176.095
s-hexyl glutathione	5.49	391.178
skatole	6.82	131.073
sorbate	4.93	112.052
spermine	0.95	202.216
sphinganine	7.94	301.298
testosterone	6.75	288.209
testosterone glucuronide	5.95	464.241
testosterone sulfate	6.56	368.165
theobromine	1.54	180.065
thymine	1.28	126.043
thyrotropin releasing hormone	1.22	362.171
thyroxine	6.48	776.687
trans-cinnamate	4.94	148.052
tryptamine	2	160.1
tryptophan	1.68	204.089
tyrosine	1.23	181.073
urate	1.2	168.027
ureidopropionate	1.15	132.053
urocanate	1.08	138.042
xanthosine	1.22	284.075

## Sheet: C18 ESI+ Standards
Compound Id	Retention Time (min)	Neutral Mass
(2-aminoethyl)phosphonate	1.1	125.023
1-hydroxy-2-naphthoate	6.83	188.049
1-methyladenosine	1.27	281.112
2,3-dihydroxybenzoate	3.02	154.027
2',4'-dihydroxyacetophenone	4.84	152.049
2,4-dihydroxypteridine	1.25	164.033
2,5-dihydroxybenzoate	2.24	154.027
25-hydroxycholesterol	8.45	402.35
2-aminoisobutyrate	1.08	103.063
2-quinolinecarboxylate	2.27	173.05
3,4-dihydroxybenzoate	1.23	154.026
3,5-diiodo-l-thyronine	5.57	524.903
3,5-diiodo-l-tyrosine	3.63	432.867
3-amino-5-hydroxybenzoate	1.22	153.042
3-hydroxyanthranilate	1.68	153.044
3-hydroxyphenylacetate	5.72	152.047
3-methoxytyramine	1.25	167.096
3-methoxytyrosine	1.25	211.084
3-methyl-2-oxindole	4.94	147.07
3-sulfinoalanine	1.11	153.008
4-coumarate	4.18	164.049
4-hydroxybenzaldehyde	3.14	122.037
4-hydroxybenzoate	2.16	138.032
4-imidazoleacetate	1.07	126.043
4-pyridoxate	1.33	183.053
4-quinolinecarboxylate	1.28	173.05
5,6 dimethylbenzimidazole	3.41	146.084
5-aminolevulinate	1.04	131.057
5-aminopentanoate	1.06	117.078
5-hydroxyindoleacetate	2.28	191.061
5-methylcytosine	1.07	125.059
adenine	1.63	135.054
aicar	1.13	338.06
aldosterone	5.57	360.194
allantoin	1.08	158.044
allopregnanetrione	7.05	330.219
alpha-tocopherol	9.08	430.381
androstenedione	6.94	286.193
aniline-2-sulfonate	1.34	173.014
anserine	1.03	240.121
asparagine	1.08	132.053
azelate	5.22	188.107
benzaldehyde	6.61	106.042
beta-nicotinamide adenine dinucleotide	1.53	663.103
biliverdin	6.82	582.245
biotin	3.7	244.092
bis(2-ethylhexyl)phthalate	10.37	390.277
caffeate	2.89	180.042
carnosine	1.03	226.106
cdp-ethanolamine	1.18	446.057
citicoline	1.7	488.105
citrulline	1.07	175.095
cortexolone	6.41	346.214
corticosterone	6.26	346.214
cortisol	5.86	362.209
cortisol 21-acetate	6.54	404.22
cyclic gmp	1.22	345.045
cystathionine	1.06	222.066
cytidine	1.06	243.084
cytosine	1.05	111.043
d4-hydroxychloroquine istd	2.76	339.201
deoxyadenosine	1.23	251.102
deoxycarnitine	1.11	145.11
deoxycorticosterone acetate	7.58	372.23
deoxycytidine	1.07	227.089
deoxycytidine monophosphate	1.14	307.055
deoxyguanosine	1.23	267.096
desmosterol	9.76	384.339
dethiobiotin	4.5	214.132
diaminopimelate	1.06	190.095
dopamine	1.22	153.078
epinephrine	1.07	183.088
epitestosterone	7.05	288.209
estradiol-17alpha	6.78	272.178
estrone	6.85	270.162
etiocholanone	7.4	290.225
filgotinib	5.28	425.152
galactosamine	1.03	179.078
genistein	6	270.052
genistein d4 istd	5.93	274.077
glucosamine	1.03	179.078
glucosamine 6-phosphate	1.06	259.045
glutamate	1.07	147.052
glutamine	1.07	146.068
glutarylcarnitine	1.25	275.137
glycochenodeoxycholate	7.11	449.314
glycocholate	6.59	465.31
guanine	1.2	151.049
hippurate	2.71	179.06
homocysteine thiolactone	1.07	117.024
hydroxychloroquine	2.76	335.176
indole	6.14	117.058
indole 3-acetamide	3.96	174.079
tryptophol	5.17	161.084
indole-3-acetate	5.19	175.065
indole-3-acrylate	5.63	187.063
indole-3-carboxaldehyde	4.93	145.052
indole-3-lactate	4.72	205.074
indole-3-methyl acetate	6.28	189.079
indole-3-propionate	5.76	189.078
indole-3-pyruvate	4.69	203.058
indoleacetaldehyde	4.72	159.069
isoleucine	1.22	131.094
kynurenine	1.3	208.084
lauroylcarnitine	7.34	343.272
leucine	1.25	131.094
liothyronine	6.12	650.79
lipoamide	5.54	205.062
lumichrome	5.19	242.079
melatonin	5.16	232.121
methyl jasmonate	7.11	224.141
methyl vanillate	5.31	182.058
methylguanidine	1.07	73.064
n6-(delta2-isopentenyl)-adenine	3.96	203.117
n-acetylasparagine	1.15	174.063
n-acetylglutamate	1.22	189.063
n-acetylglycine	1.21	117.042
n-acetylmethionine	2.02	191.061
n-acetylneuraminate	1.11	309.105
n-acetylproline	1.53	157.073
n-acetylputrescine	1.07	130.11
n-acetylserine	1.17	147.053
n-formyl-l-methionine	1.81	177.044
n-methylaspartate	1.1	147.052
omega hydroxydodecanoate	1.39	216.173
ophthalmate	1.22	289.126
ox07417	6.47	369.108
palmitoylcarnitine	8.56	399.335
pantothenate	1.42	219.111
phosphorylcholine	1.24	183.065
progesterone	7.71	314.225
pyridoxal-phosphate	1.22	247.023
quinoline	1.51	129.058
s-adenosylhomocysteine	1.21	384.121
s-adenosylmethionine	1.02	398.135
salsolinol	1.22	179.097
s-carboxymethylcysteine	1.1	179.024
sebacate	5.73	202.123
selenomethionine	1.23	196.995
serine	1.06	105.042
serotonin	5.14	176.095
s-hexyl glutathione	5.49	391.178
skatole	6.82	131.073
sorbate	4.93	112.052
spermine	0.95	202.216
sphinganine	7.94	301.298
testosterone	6.75	288.209
testosterone glucuronide	5.95	464.241
testosterone sulfate	6.56	368.165
theobromine	1.54	180.065
thymine	1.28	126.043
thyrotropin releasing hormone	1.22	362.171
thyroxine	6.48	776.687
trans-cinnamate	4.94	148.052
tryptamine	2	160.1
tryptophan	1.68	204.089
tyrosine	1.23	181.073
urate	1.2	168.027
ureidopropionate	1.15	132.053
urocanate	1.08	138.042
xanthosine	1.22	284.075

## Sheet: Sheet4
Compound Id	Retention Time (min)	Neutral Mass
10-hydroxydecanoate	5.84	188.141
1-aminocyclopropanecarboxylate	1.07	101.048
1-hydroxy-2-naphthoate	6.81	188.047
1-methyladenosine	1.3	281.112
2',4'-dihydroxyacetophenone	4.86	152.047
2,4-dihydroxypteridine	1.2	164.033
2,5-dihydroxybenzoate	2.22	154.027
2-aminophenol	1.2	109.053
2-hydroxy-4-(methylthio)butanoate	1.79	150.035
2-hydroxybutyrate	1.3	104.047
2-hydroxyphenylacetate	2.39	152.047
2-methylglutarate	1.76	146.058
2-methylmaleate	1.3	130.027
2-oxobutanoate	1.3	102.032
2-quinolinecarboxylate	2.22	173.048
3-(2-hydroxyphenyl)propanoate	4.73	166.063
3,4-dihydroxybenzoate	1.61	154.027
3,4-dihydroxyphenylacetate	1.3	168.042
3,5-diiodo-l-thyronine	5.54	524.893
3,5-diiodo-l-tyrosine	3.58	432.867
3-dehydroshikimate	1.1	172.037
3-hydroxymethylglutarate	1.3	162.053
3-hydroxyphenylacetate	3.01	152.047
3-methoxy-4-hydroxymandelate	1.3	198.053
3-methoxytyrosine	1.2	211.084
3-methyl-2-oxindole	2.2	147.068
3-nitro-l-tyrosine	1.47	226.059
3-phosphoglycerate	1.25	185.993
3-sulfinoalanine	1	153.01
4-acetamidobutanoate	1.25	145.074
4-coumarate	4.11	164.047
4-guanidinobutanoate	1.2	145.085
4-hydroxybenzaldehyde	3.05	122.037
4-hydroxybenzoate	2.17	138.032
4-hydroxy-l-phenylglycine	1.09	167.058
4-imidazoleacetate	1.1	126.043
4-methylcatechol	1.4	124.052
4-pyridoxate	1.25	183.053
4-quinolinecarboxylate	1.2	173.048
5,6 dimethylbenzimidazole	3.24	146.084
5-aminolevulinate	1.1	131.058
5-hydroxyindoleacetate	2.2	191.058
5-hydroxylysine	1	162.1
5-hydroxytryptophan	1.3	220.085
6-carboxyhexanoate	2.75	160.074
6-hydroxynicotinate	1.3	139.027
acetoacetate	1.3	102.032
acetoin	1.3	88.0524
adenine	1.2	135.054
adenosine	1.1	267.097
adenosine 2',3'-cyclic phosphate	1	329.053
adenosine diphosphate ribose	1.3	559.072
adipate	1.64	146.058
aicar	1.2	338.063
allantoin	1	158.044
allothreonine	1	119.058
aminoadipate	1.1	161.069
aniline-2-sulfonate	1.3	173.015
anserine	1.05	240.122
arachidate	11.33	312.303
arginine	1.1	174.112
asparagine	1	132.054
aspartate	1.1	133.037
azelate	5.18	188.105
benzoate	5.8	122.037
bilirubin	10.1	584.264
biliverdin	6.81	582.248
biotin	3.67	244.088
caffeate	2.81	180.042
carnosine	1	226.107
cdp-ethanolamine	1	446.06
cholate	7.01	408.288
cis-4-hydroxy-d-proline	1	131.058
citicoline	1	488.107
citrulline	1.1	175.096
cortexolone	6.4	346.214
cortisol	5.84	362.209
cortisol 21-acetate	6.51	404.22
cortisone	5.87	360.194
cortisone d8 istd	5.86	368.244
creatine	1.1	131.07
cyclic amp	1.06	329.053
cyclic gmp	1	345.047
cystathionine	1	222.067
cystine	1	240.024
cytidine	1.06	243.085
cytidine 2',3'-cyclic phosphate	1	305.041
d-alanine	1.05	89.0477
decanoate	7.82	172.146
deoxyadenosine monophosphate	1.2	331.068
deoxycarnitine	1.3	145.11
deoxycytidine	1.2	227.091
deoxycytidine monophosphate	1.05	307.057
deoxyguanosine	1.2	267.097
deoxyuridine	1.2	228.075
deoxyuridine-monophosphate	1.25	308.041
dethiobiotin	4.49	214.132
diaminopimelate	1	190.095
dihydroorotate	1.15	158.033
dopamine	1.2	153.079
d-ornithine	1.1	132.09
d-ribose 5-phosphate	1.3	230.019
elaidate	9.95	282.256
epinephrine	1.2	183.089
erucate	11.16	338.318
ethanolamine phosphate	1	141.019
ethylmalonate	1.61	132.042
ferulate	4.57	194.058
folate	2.33	441.14
fumarate	1.3	116.011
galactitol	1	182.079
galactose 1-phosphate	1.25	260.03
galacturonate	1	194.043
gamma-linolenate	9.13	278.225
glucosamine 6-phosphate	1.1	259.046
glucose 6-phosphate	1.35	260.03
glucuronate	1.05	194.043
glutamate	1.05	147.053
glutamine	1.06	146.069
glutarate	1.3	132.042
glutarylcarnitine	1.25	275.137
glycerate	1.1	106.027
glycerol 3-phosphate	1.2	172.014
glycochenodeoxycholate	7.1	449.314
glycocholate	6.57	465.309
guanidinosuccinate	1.1	175.059
guanine	1.2	151.049
guanosine	1.2	283.092
hippurate	2.63	179.058
histidine	1.1	155.07
homocystine	1.1	268.055
homoserine	1	119.058
homovanillate	3.27	182.058
hydroxyphenyllactate	1.77	182.058
hypotaurine	1.09	109.02
hypoxanthine	1.2	136.038
indole-3-acetamide	3.85	174.079
indoxyl sulfate	2.34	213.01
inosine	1.2	268.081
inosine monophosphate	1.15	348.047
isoleucine	1.25	131.095
itaconate	1.4	130.027
kynurenate	2.23	189.043
kynurenine	1.41	208.085
lactose	1	342.116
laurate	8.57	200.178
l-dopa	1.2	197.069
leucine	1.3	131.095
liothyronine	6.1	650.79
lithocholate	8.48	376.298
lithocholyltaurine	7.34	483.302
l-ornithine	1.05	132.09
l-tryptophanamide	1.56	203.106
lysine	1	146.106
maleate	1.2	116.011
malonate	1.19	104.011
mandelate	2.34	152.047
mannose 6-phosphate	1.25	260.03
melatonin	5.1	232.121
methionine	1.15	149.051
methionine sulfoximine	1.05	180.057
methyglutarate	1.71	146.058
methylmalonate	1.3	118.027
methylthioadenosine	1.67	297.09
mevalonate	1.2	148.074
myristate	9.29	228.209
n,n-dimethylarginine	1.05	202.143
n-acetylalanine	1.2	131.058
n-acetylasparagine	1.1	174.064
n-acetylaspartate	1.3	175.048
n-acetylcysteine	1.3	163.03
n-acetylgalactosamine	1.05	221.09
n-acetylglucosamine	1	221.09
n-acetylglutamate	1.2	189.064
n-acetylglycine	1.1	117.043
n-acetylleucine	4.06	173.105
n-acetylmethionine	2	191.062
n-acetylneuraminate	1.09	309.106
n-acetylphenylalanine	4.44	207.089
n-acetylproline	1.51	157.074
n-acetylserine	1.1	147.053
n-acetylserotonin	2.55	218.106
n-formylglycine	1.1	103.027
n-formyl-l-methionine	1.76	177.046
nicotinamide hypoxanthine dinucleotide	1.3	664.093
nicotinate	1.23	123.032
n-methylaspartate	1.1	147.053
n-methylglutamate	1.1	161.069
norleucine	1.25	131.095
norvaline	1.1	117.079
oleate	9.94	282.256
omega-hydroxydodecanoate	6.63	216.173
ophthalmate	1.15	289.127
orotate	1.1	156.017
o-succinyl-homoserine	1.3	219.074
oxoadipate	1.3	160.037
oxoproline	1.2	129.043
palmitate	9.95	256.24
palmitate d31 istd	9.67	287.434
pantothenate	1.3	219.111
phenylalanine	1.3	165.079
p-hydroxyphenylacetate	2.42	152.047
pipecolate	1.2	129.079
pregnenolone sulfate	6.73	396.197
proline	1.1	115.063
protoporphyrin	9.35	562.258
pterin	1.3	163.049
purine	1.23	120.044
pyridoxal-phosphate	1.3	247.025
pyridoxamine	1	168.09
pyridoxine	1.2	169.074
pyrocatechol	1.61	110.037
pyroglutamate	1.2	129.043
pyrrole-2-carboxylate	2.12	111.032
quinate	1.05	192.063
raffinose	1.05	504.169
resorcinol monoacetate	4.85	152.047
rhamnose	1.1	164.069
rosmarinate	5.19	360.084
s-adenosylhomocysteine	1	384.122
salicylamide	3.62	137.048
salsolinol	1.2	179.095
s-carboxymethylcysteine	1.1	179.025
sebacate	5.69	202.12
selenomethionine	1.3	196.995
serine	1.05	105.043
shikimate	1.1	174.053
stachyose	1	666.222
stearate	10.6	284.272
suberate	4.43	174.089
succinate	1.23	118.027
taurine	1.07	125.015
theophylline	1.81	180.065
thiopurine s-methylether	2.56	166.031
threonine	1.06	119.058
thymidine	1.25	242.09
thymidine-monophosphate	1.08	322.057
thymine	1.25	126.043
thyrotropin releasing hormone	1.2	362.17
thyroxine	6.45	776.687
trans-4-hydroxy-l-proline	1	131.058
trehalose	1.1	342.116
tryptophan	1.79	204.09
tyrosine	1.2	181.074
uracil	1.15	112.027
uracil 5-carboxylate	1.3	156.017
urate	1.2	168.028
uridine	1.2	244.07
uridine monophosphate	1.25	324.036
urocanate	1.2	138.043
ursodeoxycholate	7.03	392.293
valine	1.15	117.079
xanthine	1.2	152.033
xanthosine	1.2	284.076
xanthurenate	1.84	205.037
