# Supplementary material for: Extraction and untargeted analysis of metabolome from undemineralised cortical bone matrix
Source: Royal Society of Chemistry journal article supplement (doi:10.1039/d4mo00015c), 2024-07-22
Supplement: d4mo00015c3.xlsx [file d4mo00015c3.xlsx]

## Sheet: HILIC ESI+
Assigned Annotation	Compound	Neutral mass (Da)	m/z	Retention time (min)	Chromatographic peak width (min)	Identifications	Identifier	MSI Classification	Adducts	Formula	Score	Fragmentation Score	Abs Mass Error (ppm)	Isotope Similarity
alpha-Aminodiphenylacetic acid	3.31_228.1018m/z		228.102	3.31	0.411	4	3060-50-2	2	M+H	C14H13NO2	46.2	43.9	0.3	87.4
alpha-Ergocryptine	3.09_575.3143n	575.314	576.322	3.09	0.854	1	511-09-1	2	M+H-H2O, M+H	C32H41N5O5	41.1	21.3	6.2	91.4
1-(1Z-Hexadecenyl)-sn-glycero-3-phosphocholine	3.21_480.3447m/z		480.345	3.21	0.51	1	97802-53-4	2	M+H	C24H50NO6P	51.5	60.7	0.4	97.4
1-(9Z-Octadecenoyl)-sn-glycero-3-phosphocholine	3.55_521.3475n	521.347	522.355	3.55	0.655	1	19420-56-5	2	M+H, M+Na	C26H52NO7P	49	58.3	1.3	88.2
1,2-Benzenediamine, N-phenyl-	2.53_185.1082m/z		185.108	2.53	0.341	3	534-85-0	2	M+H	C12H12N2	46.4	43.8	4.7	93.7
1,3-Dimethyluracil	6.98_140.0589n	140.059	123.056	6.98	0.815	2	874-14-6	2	M+H-H2O, M+H	C6H8N2O2	46	33.9	2.3	98.5
17-Phenyl trinor prostaglandin E2	3.02_369.2038m/z		369.204	3.02	0.658	12	38315-43-4	2	M+H-H2O	C23H30O5	49.5	60.6	5.8	93.4
17-Phenyl trinor prostaglandin F2alpha methyl ester	12.30_385.2312m/z		385.231	12.3	0.173	8	38315-47-8	2	M+H-H2O	C24H34O5	41.3	46.1	15.2	76
1-Aminocyclohexanecarboxylic acid	6.84_143.0957n	143.096	144.103	6.84	0.987	1	2756-85-6	2	M+H, M+K	C7H13NO2	43.5	26.5	7.5	99.3
1-Hexadecanoyl-sn-glycero-3-phosphocholine	3.75_496.3347m/z		496.335	3.75	0.755	3	BnH-6djT5rFdNiC	2	M+H	C24H50NO7P	41.9	22.4	10.3	98.1
1-Hexadecyl-sn-glycero-3-phosphocholine	3.97_482.3611m/z		482.361	3.97	0.612	1	52691-62-0	2	M+H	C24H52NO6P	44.6	28.6	1.2	95.8
1H-Indole-4-carboxaldehyde	6.48_146.0602m/z		146.06	6.48	0.342	4	1074-86-8	2	M+H	C9H7NO	43.5	28.1	0.8	90.2
1-Methylpiperazine	3.02_101.1075m/z		101.108	3.02	0.294	1	109-01-3	2	M+H	C5H12N2	41.7	16.3	1.5	93.9
2-(2-Butoxyethoxy)acetic acid	3.48_177.1122m/z		177.112	3.48	0.606	2	82941-26-2	2	M+H	C8H16O4	46.7	42.9	0.2	90.8
2-Amino-1-phenylethanol	5.63_120.0813m/z		120.081	5.63	0.955	9	7568-93-6	2	M+H-H2O	C8H11NO	46.6	37.9	3.6	99.3
2-Hydroxybenzyl alcohol	5.60_107.0492m/z		107.049	5.6	0.515	9	90-01-7	2	M+H-H2O	C7H8O2	44.7	32.4	0.9	92.2
2-Methylindoline	2.89_134.0967m/z		134.097	2.89	0.343	8	6872-06-06	2	M+H	C9H11N	46.4	44.6	2.4	90.3
2-Phenylacetamide	7.74_136.0758m/z		136.076	7.74	0.39	6	103-81-1	2	M+H	C8H9NO	46	38	1.2	93.2
3-Methyl-gamma-butyrolactone	8.20_101.0597m/z		101.06	8.2	0.293	6	1679-47-6	2	M+H	C5H8O2	42.7	19.3	0.2	94.2
4,7-Dimethyl-3-(4-methoxyphenyl)coumarin	10.22_281.1228m/z		281.123	10.22	0.341	12	332104-43-5	2	M+H	C18H16O3	41.7	33.8	19.8	94.3
4-Androsten-17beta-ol-3-one glucosiduronate	12.20_465.2519m/z		465.252	12.2	0.443	2	1180-25-2	2	M+H	C25H36O8	40.7	49.3	7.7	62.8
4-Chromanone	5.65_148.0522n	148.052	131.049	5.65	0.441	2	491-37-2	2	M+H-H2O, M+H	C9H8O2	43.4	28.2	1.3	90.3
4-Hydroxybenzaldehyde	7.76_123.0442m/z		123.044	7.76	0.317	3	123-08-0	2	M+H	C7H6O2	43.4	25.4	0.8	92.5
4-Imidazoleacrylic acid	2.46_138.0431n	138.043	139.05	2.46	0.438	4	104-98-3	2	M+H-H2O, M+H	C6H6N2O2	55.4	80.5	1.4	98.4
5,5-Dimethylimidazolidine-2,4-dione	3.12_129.0657m/z		129.066	3.12	0.39	5	77-71-4	2	M+H	C5H8N2O2	42.9	19.8	0.9	95.7
5-Aminovaleric acid	8.25_100.0757m/z		100.076	8.25	0.244	9	660-88-8	2	M+H-H2O	C5H11NO2	40.8	10.3	0.3	93.9
5-Methyl-5,6-Dihydrouracil	2.43_129.0657m/z		129.066	2.43	0.17	5	696-04-8	2	M+H	C5H8N2O2	48.4	49.8	1	93.6
6-Ketoprostaglandin F1alpha	12.79_370.2331n	370.233	393.222	12.79	0.616	10	58962-34-8	2	M+H, M+Na	C20H34O6	40	16.2	6.6	91.2
Adenine, N6-methyl	2.07_150.0773m/z		150.077	2.07	0.194	1	443-72-1	2	M+H	C6H7N5	44.6	31.9	0.8	92
Ala-Pro	9.66_187.1080m/z		187.108	9.66	0.268	3	13485-59-1	2	M+H	C8H14N2O3	40.9	16.1	1.7	90.3
Ala-Tyr-Arg	12.00_409.2204m/z		409.22	12	0.296	6	pAVq316xsRukYis	2	M+H	C18H28N6O5	44	25.5	2.5	97.4
Allopurinol	2.53_136.0389n	136.039	137.046	2.53	0.39	4	315-30-0	2	M+H-H2O, M+H	C5H4N4O	51.1	59.9	3	99.2
Arg-Ala	11.44_246.1570m/z		246.157	11.44	0.269	1	g2R06jFUjiRPQfY	2	M+H	C9H19N5O3	40	16.2	4	88.4
Arg-Cys-Lys	4.02_406.2206m/z		406.221	4.02	0.27	4	FrdQM46EeuMF1C9	2	M+H	C15H31N7O4S	40.3	32.5	6.2	76
Asp-Met-Arg	5.43_421.1853m/z		421.185	5.43	0.565	7	8ljTlTzqxn9HJn6	2	M+H	C15H28N6O6S	45.3	54.8	2.5	74.7
Asp-Met-Lys	6.58_393.1769m/z		393.177	6.58	0.607	6	Ogjv0QDXhKWbRDR	2	M+H	C15H28N4O6S	50.6	70.4	8.4	91.7
Benzenemethanol, 4-methyl-	3.12_105.0700m/z		105.07	3.12	0.512	7	589-18-4	2	M+H-H2O	C8H10O	53.4	70.8	0.8	96.9
Creatinine	3.26_114.0657m/z		114.066	3.26	0.411	3	60-27-5	1	M+H	C4H7N3O	45	35.3	4	94.5
Cyclopropanecarboxylic acid, 1-amino-	2.21_101.0474n	101.047	102.055	2.21	0.219	3	22059-21-8	1	M+H-H2O, M+H	C4H7NO2	44.3	30	2.9	95
Cys-Asn-Lys	10.49_364.1603m/z		364.16	10.49	0.414	6	ZfnoajpYzQ9pkN5	2	M+H	C13H25N5O5S	41.5	27.5	12.8	93.5
Cys-Lys-Lys	6.87_378.2120m/z		378.212	6.87	1.084	2	QMara@9WBIllyMV	2	M+H	C15H31N5O4S	45.9	51.9	13.2	91.4
Cys-Thr-Arg	10.59_379.1711m/z		379.171	10.59	0.268	9	uYoMzJ0AO3zQQxA	2	M+H	C13H26N6O5S	42.1	35.4	12.4	88.2
D-Gluconic acid, permethyl-, methyl ester	7.35_281.1596m/z		281.16	7.35	0.792	4	6RquMjmaZC6t2b1	2	M+H	C12H24O7	42.1	19	0.6	92
Dibenzylamine	2.14_198.1285m/z		198.129	2.14	0.412	3	103-49-1	2	M+H	C14H15N	40.1	7.17	4	97.9
DL-beta-Homoleucine	8.49_146.1177m/z		146.118	8.49	0.706	3	3653-34-7	2	M+H	C7H15NO2	47.1	38.2	1	98.3
DL-Arginine	12.00_174.1122n	174.112	175.119	12	0.37	4	7200-25-1	1	M+H, M+Na	C6H14N4O2	42	19.9	3.1	93.6
DL-Indole-3-lactic acid	6.51_188.0709m/z		188.071	6.51	0.608	10	832-97-3	2	M+H-H2O	C11H11NO3	48.6	48.8	1.6	96.2
DL-Lysine, 5-hydroxy-	3.82_145.0976m/z		145.098	3.82	0.245	2	6000-08-04	2	M+H-H2O	C6H14N2O3	40.3	12.7	2.8	92.3
D-Pyroglutamic acid	6.41_130.0499m/z		130.05	6.41	0.537	6	4042-36-8	1	M+H	C5H7NO3	49.5	53.9	0.5	94.3
Gln-Ser-Arg	13.14_390.2100m/z		390.21	13.14	0.247	8	uWQ6hIacAe3XyIC	2	M+H	C14H27N7O6	41.2	24.8	1.1	82.4
Glu-Met-Lys	10.22_407.2021m/z		407.202	10.22	0.341	13	afGrqvYPQ5EkMgr	2	M+H	C16H30N4O6S	40.1	37.7	15.3	78.5
Glycyl-L-4-Hydroxyproline	10.68_189.0868m/z		189.087	10.68	0.243	5	24587-32-4	2	M+H	C7H12N2O4	49.5	57.2	0.9	91.1
Gly-Pro	10.29_172.0850n	172.085	173.092	10.29	0.462	2	704-15-4	2	M+H, M+Na	C7H12N2O3	53	75.4	1.5	91.3
Gly-Pro-Arg	12.50_328.1868n	328.187	329.194	12.5	0.369	2	iWSmGM3KgAUmgZg	2	M+H, M+Na	C13H24N6O4	48.8	53.9	2.6	93.1
Guanine	4.65_152.0572m/z		152.057	4.65	0.196	2	73-40-5	1	M+H	C5H5N5O	45.3	37.1	3.1	92.8
Heptaethylene glycol	4.92_309.1924m/z		309.192	4.92	0.441	5	5617-32-3	2	M+H-H2O	C14H30O8	42.6	31.6	5	86.9
Hexanedioic acid, 2-amino-	4.99_144.0659m/z		144.066	4.99	0.171	3	542-32-5	2	M+H-H2O	C6H11NO4	46	40.4	2.3	92.4
His-Pro	4.19_235.1196m/z		235.12	4.19	0.46	2	PuBCkJNfQSfG8Gc	2	M+H-H2O	C11H16N4O3	49	50.8	2.5	97.1
Ile-His	8.47_291.1431m/z		291.143	8.47	0.317	5	fuE6IaGctvp9vBG	2	M+Na	C12H20N4O3	42.1	14.6	1.3	97.6
Isocarbamid	4.87_186.1241m/z		186.124	4.87	0.246	5	30979-48-7	2	M+H	C8H15N3O2	41.5	19.8	2.1	90.2
Isocytosine	3.45_112.0504m/z		112.05	3.45	0.362	2	108-53-2	2	M+H	C4H5N3O	45.7	35.3	1.3	94.5
L-Carnitine	8.15_162.1126m/z		162.113	8.15	0.268	4	541-15-1	1	M+H	C7H15NO3	43.6	26.9	0.5	91.6
L-Citrulline	10.39_176.1025m/z		176.102	10.39	0.243	2	372-75-8	1	M+H	C6H13N3O3	46.6	44.2	2.7	92.1
L-Histidine	11.29_156.0768m/z		156.077	11.29	0.318	5	71-00-1	1	M+H	C6H9N3O2	56.4	89.9	0.1	92.2
L-Histidine, 3-methyl-	2.99_170.0936m/z		170.094	2.99	0.245	9	368-16-1	2	M+H	C7H11N3O2	46.4	48.9	7.1	91.2
L-Lysine	12.27_147.1132m/z		147.113	12.27	0.271	2	56-87-1	1	M+H	C6H14N2O2	55.5	87.6	2.4	92.5
L-Ngamma-Monomethylarginine	10.76_189.1350m/z		189.135	10.76	0.341	2	17035-90-4	2	M+H	C7H16N4O2	45.4	38.7	2	90.8
L-N5-(1-Imino-3-pentenyl) ornithine	5.01_214.1549m/z		214.155	5.01	0.416	2	Sri9vThkjOADzu9	2	M+H	C10H19N3O2	41.8	20.8	0.3	88.7
L-Pipecolic acid	7.98_130.0861m/z		130.086	7.98	0.39	5	3105-95-1	1	M+H	C6H11NO2	47.3	44.9	0.9	92.9
L-Proline	8.00_116.0706m/z		116.071	8	0.585	2	147-85-3	1	M+H	C5H9NO2	56.2	84.3	0.3	97.2
L-Threonine	3.14_102.0549m/z		102.055	3.14	0.244	6	72-19-5	2	M+H-H2O	C4H9NO3	48.4	48.3	0.6	94.7
Lys-Ala-Arg	2.67_374.2528m/z		374.253	2.67	0.294	5	dnEGcYwJDqayR@M	2	M+H	C15H31N7O4	42.3	41.8	4.8	75.4
Lys-Ile-Arg	2.60_416.2982m/z		416.298	2.6	0.44	8	cGt5Ft3f65JqtX5	2	M+H	C18H37N7O4	44.1	25.2	0.7	96
Lyso-PAF C-18	3.65_510.3921m/z		510.392	3.65	0.462	1	74430-89-0	2	M+H	C26H56NO6P	40.4	12.8	0.5	89.6
Lyso-Sphingomyelin	8.08_464.3382n	464.338	487.327	8.08	0.414	2	1670-26-4	2	M+H, M+Na	C23H49N2O5P	48.3	47.5	0.7	94.9
Lys-Ser-Lys	2.50_362.2335m/z		362.233	2.5	0.561	2	lNtWuSeB4anmR0C	2	M+H	C15H31N5O5	43.1	42.2	17.4	91.1
Met-Glu-Lys	2.36_407.1908m/z		407.191	2.36	0.243	11	8Y74G@8Ly002KOv	2	M+H	C16H30N4O6S	42.1	41	12.5	83
Methaqualone	6.41_250.1070n	250.107	273.096	6.41	0.585	1	72-44-6	2	M+H, M+Na	C16H14N2O	44.2	46.9	14.6	89.4
Met-Pro-Lys	6.19_375.2092m/z		375.209	6.19	1.32	26	9WxsUCDJV7qKkZY	2	M+H	C16H30N4O4S	41.1	46	8.5	68.9
N,N'-Diallyl-2,3-dihydroxysuccinamide	3.62_229.1193m/z		229.119	3.62	0.267	12	58477-85-3	2	M+H	C10H16N2O4	41	22	4.6	88.1
N-alpha-Acetyl-L-arginine	9.98_217.1292m/z		217.129	9.98	0.146	2	155-84-0	2	M+H	C8H16N4O3	46.2	42.7	1.3	89.7
N-Acetyl-D-lactosamine	5.92_366.1395m/z		366.139	5.92	0.561	3	32181-59-2	2	M+H-H2O	C14H25NO11	44.4	36.6	0	85.3
N-Butylaniline	2.29_150.1283m/z		150.128	2.29	0.291	4	1126-78-9	2	M+H	C10H15N	43.7	27.1	4.2	96.1
N-Butyryl-L-homoserine lactone	2.12_171.0899n	171.09	172.097	2.12	0.267	2	67605-85-0	2	M+H-H2O, M+H	C8H13NO3	41.6	18	1.9	92.4
N-Ethyl-N-isopropylaniline	2.09_164.1436m/z		164.144	2.09	0.34	2	54813-77-3	2	M+H	C11H17N	46	32.5	1.1	98.6
N-Methyl-alpha-aminoisobutyric acid	7.18_118.0867m/z		118.087	7.18	1.134	8	2566-34-9	2	M+H	C5H11NO2	40.1	5.55	3.9	99.5
N-Nitrosopiperidine	7.39_115.0867m/z		115.087	7.39	0.462	3	100-75-4	2	M+H	C5H10N2O	40.2	7.72	1.3	95
N-Palmitoylglycine	2.09_314.2695m/z		314.269	2.09	1.069	2	2441-41-0	2	M+H	C18H35NO3	43.8	23.9	1.7	97.2
PAF C-16	3.45_524.3705m/z		524.37	3.45	0.557	3	74389-68-7	2	M+H	C26H54NO7P	53.3	76.7	1.1	91.1
Palmitoleoyl ethanolamide	2.04_298.2746m/z		298.275	2.04	0.457	1	94421-67-7	2	M+H	C18H35NO2	44.7	28.8	2	97.1
Phe-Asn	7.91_280.1283m/z		280.128	7.91	0.316	5	o0lDhhY@GfnokC7	2	M+H	C13H17N3O4	40.4	17.5	3.1	87.9
Phe-Gly-Arg	11.83_379.2088m/z		379.209	11.83	0.369	7	WBJp6mDXj8lNg5B	2	M+H	C17H26N6O4	45.5	40.3	0	87
Phenylacetaldehyde	3.12_103.0541m/z		103.054	3.12	0.293	1	122-78-1	2	M+H-H2O	C8H8O	46.3	41.3	1	91.7
Phe-Tyr	5.70_329.1525m/z		329.152	5.7	0.564	7	HJBiB9UCuofkN4D	2	M+H	C18H20N2O4	47.2	52.4	8.8	93.4
Pregabalin	4.50_160.1329m/z		160.133	4.5	0.193	2	148553-50-8	2	M+H	C8H17NO2	43.9	30.6	1.7	90.8
Pro-Gln-Arg	12.37_399.2233n	399.223	400.231	12.37	0.295	2	kILZPrvMDn0EN3W	2	M+H, M+Na	C16H29N7O5	40.2	6.55	0.7	95.4
Pyrimido[1,2-a]azepine, 2,3,4,6,7,8,9,10-octahydro-	2.14_153.1392m/z		153.139	2.14	0.243	1	6674-22-2	2	M+H	C9H16N2	41.2	20.3	3.8	90
PyroGlu-Ala	2.72_201.0874m/z		201.087	2.72	0.318	5	mAkmyjUq0VVvstF	2	M+H	C8H12N2O4	42.7	20.4	2.1	95.4
PyroGlu-Gln-Arg	10.07_414.2088m/z		414.209	10.07	0.438	6	h6ngZ1i2N7baQI3	2	M+H	C16H27N7O6	42.5	48.7	1.8	65.9
PyroGlu-Tyr	5.43_293.1145m/z		293.115	5.43	0.491	12	YlVy8eUNxAcIzzp	2	M+H	C14H16N2O5	41.1	29.6	4.5	80.9
Tetrahydrozoline	2.65_201.1388m/z		201.139	2.65	0.244	2	84-22-0	2	M+H	C13H16N2	40.6	16.5	1.1	87.8
Thr-Ala-Arg	4.38_347.2056m/z		347.206	4.38	0.508	4	MisQA-ho3cM4o1X	2	M+H	C13H26N6O5	40.8	29.3	5.3	81
Thr-Trp-Lys	7.79_434.2360m/z		434.236	7.79	0.341	8	z-@1w@jWXu4M-WP	2	M+H	C21H31N5O5	40.9	43.1	8.8	70.9
trans-2-Hydroxycinnamic acid	7.74_164.0479n	164.048	165.055	7.74	0.342	5	614-60-8	2	M+H-H2O, M+H	C9H8O3	41	18.1	3.3	90.7
trans-Epoxysuccinyl-L-leucylamido(4-guanidino)butane	6.07_358.2086m/z		358.209	6.07	0.535	4	66701-25-5	2	M+H	C15H27N5O5	48.6	54.9	0.3	88.4
Triethanolamine	7.06_149.1057n	149.106	150.113	7.06	0.987	1	102-71-6	2	M+H, M+Na	C6H15NO3	44.4	26.6	3.2	99.3
Trp-Phe	10.22_351.1529n	351.153	352.16	10.22	0.292	2	6686-02-08	2	M+H-H2O, M+H	C20H21N3O3	42.5	36.9	15.3	91.5
Trp-Ser-Arg	12.89_448.2304m/z		448.23	12.89	0.394	4	2QGgU41Sl5oLyPL	2	M+H	C20H29N7O5	43.8	36.2	0.2	82.9
Val-Arg	11.98_274.1884m/z		274.188	11.98	0.247	2	cTXXNZH5voWH7UG	2	M+H	C11H23N5O3	41	23.2	3.8	86.4
Xanthine	2.63_153.0408m/z		153.041	2.63	0.22	2	69-89-6	2	M+H	C5H4N4O2	42.7	21.4	0.7	92.9

## Sheet: HILIC ESI-
Assigned Annotation	Compound	Neutral mass (Da)	m/z	Retention time (min)	Chromatographic peak width (min)	Identifications	Identifier	MSI Classification	Adducts	Formula	Score	Fragmentation Score	Abs Mass Error (ppm)	Isotope Similarity
1,11-Undecanedicarboxylic acid	3.29_243.1604m/z		243.16	3.29	0.467	2	505-52-2	2	M-H	C13H24O4	52.9	78.3	0.7	87.2
13,14-Dihydro-15-keto-tetranor prostaglandin F1beta	3.71_299.1850m/z		299.185	3.71	0.467	1	23015-45-4	2	M-H	C16H28O5	48.2	56.7	4.7	89.9
2,3-Dinor prostaglandin E1	2.70_325.2010m/z		325.201	2.7	0.47	10	k0m0hmbMTbQASFx	2	M-H	C18H30O5	48.5	49.3	3.3	96.9
2-Ethyl-2-hydroxybutyric acid	2.05_131.0709m/z		131.071	2.05	0.292	4	3639-21-2	2	M-H	C6H12O3	55.4	83.3	3.9	98.3
3-Hydroxyoctanoic acid	2.45_159.1025m/z		159.102	2.45	0.347	3	14292-27-4	2	M-H	C8H16O3	46.8	35.2	0.7	99.6
6,15-Diketo-13,14-dihydro Prostaglandin F1alpha	2.15_369.2271m/z		369.227	2.15	1.223	15	63983-53-9	2	M-H	C20H34O6	42.2	22.2	3.3	92.6
9S,11,15S-Trihydroxythromboxa-5Z,13E,17Z-trien-1-oic acid	3.19_367.2057m/z		367.206	3.19	0.319	13	71953-80-5	2	M-H	C20H32O6	52	88	18.8	90.9
9S,11R-Epidioxy-15S-hydroxy-13E-prostaenoic acid	2.32_353.2307m/z		353.231	2.32	0.272	19	52589-22-7	2	M-H	C20H34O5	45.7	45.7	7.4	90.9
Adenosine 5'-triphosphate	16.75_505.9849m/z		505.985	16.75	0.156	4	10168-83-9	1	M-H	C10H16N5O13P3	52.2	77.4	7	91.6
Azelaic acid	8.48_187.0974m/z		187.097	8.48	1.149	7	123-99-9	1	M-H	C9H16O4	40.6	4.88	1.1	99.6
Cholic acid	2.42_407.2792m/z		407.279	2.42	0.247	6	81-25-4	1	M-H	C24H40O5	40.5	11.4	2.8	94.7
DL-Phenylalanine	3.26_164.0715m/z		164.071	3.26	0.764	9	150-30-1	1	M-H	C9H11NO2	43.7	21	1.4	99.1
L-Leucine	3.48_130.0875m/z		130.088	3.48	1.032	7	61-90-5	2	M-H	C6H13NO2	42.7	16.3	1.4	98.9
L-Tyrosine	4.57_180.0668m/z		180.067	4.57	1.056	5	60-18-4	1	M-H	C9H11NO3	56.8	87.5	0.8	97.4
N-Acetyl-D-galactosamine 4-sulfate	2.60_300.0393m/z		300.039	2.6	0.346	2	45233-43-0	2	M-H	C8H15NO9S	52.5	75.2	0.6	88.1
Palmitelaidic acid	3.31_253.2157m/z		253.216	3.31	0.22	3	10030-73-6	2	M-H	C16H30O2	54.9	84	6.4	97.5
Salicylic acid	2.89_137.0236m/z		137.024	2.89	0.222	2	69-72-7	2	M-H	C7H6O3	46.9	72.5	6.2	68.9
Undecanedioic acid	5.35_215.1288m/z		215.129	5.35	0.93	1	1852-04-6	2	M-H	C11H20O4	42.6	14.8	0.2	98.4

## Sheet: C18 ESI+
Assigned Annotation	Compound	Neutral mass (Da)	m/z	Retention time (min)	Chromatographic peak width (min)	Identifications	Identifier	MSI Classification	Adducts	Formula	Score	Fragmentation Score	Abs Mass Error (ppm)	Isotope Similarity
(-)-Carveol	8.67_152.1193n	152.119	135.116	8.67	0.148	2	99-48-9	2	M+H-H2O, M+H	C10H16O	47.7	49.5	5.2	94.8
(-)-Isolongifolol	7.86_205.1940m/z		205.194	7.86	0.397	5	1139-17-9	2	M+H-H2O	C15H26O	43.2	24.9	4.7	96.7
(-)-Perillyl alcohol	5.52_153.1264m/z		153.126	5.52	0.354	18	18457-55-1	2	M+H	C10H16O	41.3	24.7	6.4	88.9
(+/-)-14-Hydroxy-4Z,7Z,10Z,12E,16Z,19Z-docosahexaenoic acid	7.86_327.2309m/z		327.231	7.86	0.222	23	87042-40-8	2	M+H-H2O	C22H32O3	42.3	21.5	2.7	93.2
(3'-(Aminocarbonyl)[1,1'-biphenyl]-3-yl)cyclohexylcarbamate	6.73_339.1750m/z		339.175	6.73	0.05	12	546141-08-6	2	M+H	C20H22N2O3	40.7	27.4	14	90.6
alpha-Ergocryptine	4.43_576.3185m/z		576.318	4.43	0.334	1	511-09-1	2	M+H	C32H41N5O5	43.3	23.9	0.9	93.4
alpha-Estradiol	6.40_273.1835m/z		273.183	6.4	0.203	5	57-91-0	1	M+H	C18H24O2	39.1	13.3	5.1	88
alpha-Pinene oxide	5.70_135.1160m/z		135.116	5.7	0.226	4	1686-14-2	2	M+H-H2O	C10H16O	44.3	32.2	5.2	95.3
beta-D-Glucopyranose, 1,6-anhydro-	1.03_163.0594m/z		163.059	1.03	0.122	13	498-07-7	2	M+H	C6H10O5	49	57.7	4.5	92.6
omega-3 Arachidonic acid	9.46_305.2457m/z		305.246	9.46	0.376	13	24880-40-8	2	M+H	C20H32O2	48.7	59.3	5.9	91.2
1-(9Z-Octadecenoyl)-sn-glycero-3-phosphocholine	8.28_522.3539m/z		522.354	8.28	0.439	1	19420-56-5	2	M+H	C26H52NO7P	41.3	29.1	2.8	80.5
1-(9Z-Octadecenoyl)-sn-glycero-3-phosphoethanolamine	8.11_480.3100m/z		480.31	8.11	0.098	2	89576-29-4	2	M+H	C23H46NO7P	42.2	19.8	3.2	95
1-(p-Tolyl)butan-1-one	4.94_163.1110m/z		163.111	4.94	0.101	4	4160-52-5	2	M+H	C11H14O	40.4	8.2	4.4	98.8
1,2,3,6-Tetrahydrobenzylalcohol	7.89_95.0856m/z		95.0856	7.89	0.247	2	1679-51-2	2	M+H-H2O	C7H12O	40	8.07	0.5	92.6
11(12)-EET	8.33_321.2392m/z		321.239	8.33	0.562	31	123931-40-8	2	M+H	C20H32O3	41.7	24.1	10.2	95.4
12(13)-Epoxy-9Z-octadecenoic acid	8.55_297.2416m/z		297.242	8.55	1	13	948310-68-7	2	M+H	C18H32O3	58.2	96.6	2.7	97.5
12-Ketodeoxycholic acid	6.30_373.2733m/z		373.273	6.3	0.1	5	5130-29-0	2	M+H-H2O	C24H38O4	43.3	25.7	1	91.9
13,14-Dihydro-15-keto-tetranor prostaglandin F1beta	5.87_300.1909n	300.191	283.188	5.87	0.779	1	23015-45-4	2	M+H-H2O, M+Na	C16H28O5	43.6	33	9.2	95
14,15-EE-(8Z)-E	9.08_324.2654n	324.265	347.255	9.08	0.744	6	519038-93-8	2	M+H-H2O, M+H, M+Na	C20H36O3	45.7	37.8	3.2	94.3
15(R)-15-Methylprostaglandin F2alpha	7.64_351.2508m/z		351.251	7.64	0.4	11	35864-81-4	2	M+H-H2O	C21H36O5	46.6	45.9	5.8	93.8
15(S)-Hydroxy-(5Z,8Z,11Z,13E)-eicosatetraenoic acid	8.33_343.2216m/z		343.222	8.33	0.635	24	54845-95-3	2	M+Na	C20H32O3	42.3	24	8.6	97.3
15-OxoETE	5.67_301.2143m/z		301.214	5.67	0.151	25	81416-72-0	2	M+H-H2O	C20H30O3	46.3	42.7	6.1	96
16,16-Dimethyl-6-ketoprostaglandin E1	5.75_419.2394m/z		419.239	5.75	0.403	13	75874-32-7	2	M+Na	C22H36O6	43.8	30.5	2.6	91.6
16,16-Dimethylprostaglandin A2	7.06_385.2341m/z		385.234	7.06	0.905	8	41691-92-3	2	M+Na	C22H34O4	41.4	19.4	2.4	90.3
16,16-Dimethylprostaglandin D2	8.67_363.2496m/z		363.25	8.67	0.538	14	64072-59-9	2	M+H-H2O	C22H36O5	40.2	14.4	8.9	96.2
16,16-Dimethylprostaglandin E2	6.30_403.2446m/z		403.245	6.3	0.327	9	39746-25-3	2	M+Na	C22H36O5	40.1	13.7	2.3	89.8
16,16-Dimethylprostaglandin F2alpha	7.18_365.2639m/z		365.264	7.18	0.227	14	39746-23-1	2	M+H-H2O	C22H38O5	43	41	12.3	86.9
16-Phenyl tetranor prostaglandin E1	6.30_357.2023m/z		357.202	6.3	0.353	21	xGFh8vnS3mdNipG	2	M+H-H2O	C22H30O5	42.3	27.8	9.9	94.3
17,20-Dimethyl Prostaglandin F1alpha	8.18_367.2810m/z		367.281	8.18	0.197	1	Tt@Z-MEuJUumJIP	2	M+H-H2O	C22H40O5	40	23	8.6	86.7
17-Octadecynoic acid	7.39_281.2463m/z		281.246	7.39	1.111	6	34450-18-5	2	M+H	C18H32O2	41.7	15.7	4.4	97.8
17-Phenyl trinor prostaglandin A2	4.07_368.2045n	368.204	391.194	4.07	0.387	1	38315-51-4	2	M+H, M+Na, M+H-H2O	C23H28O4	40.5	21.4	15.6	97
17-Phenyl trinor prostaglandin E2	6.15_369.1985m/z		369.199	6.15	0.475	12	38315-43-4	2	M+H-H2O	C23H30O5	52.8	85.1	19.4	98.3
17-Phenyl trinor-13,14-dihydroprostaglandin A2	3.83_370.2203n	370.22	393.209	3.83	0.313	3	130209-80-2	2	M+H, M+Na	C23H30O4	40.2	19.5	15.8	97.6
19,20-DiHDPA	7.41_363.2505m/z		363.25	7.41	1.24	14	1006703-13-4	2	M+H	C22H34O4	40.4	29.4	6.9	80.5
1-Arachidoyl-2-hydroxy-sn-glycero-3-phosphocholine	7.16_534.3906m/z		534.391	7.16	0.202	3	108341-80-6	2	M+H-H2O	C28H58NO7P	49	53.1	2.2	94.3
1-Cyclohexylethanol	8.33_111.1167m/z		111.117	8.33	0.366	5	1193-81-3	2	M+H-H2O	C8H16O	41.3	16.4	1.2	91.5
1-Hexadecanoyl-sn-glycero-3-phosphocholine	8.11_496.3386m/z		496.339	8.11	0.392	3	BnH-6djT5rFdNiC	2	M+H	C24H50NO7P	41	20.1	2.3	87.7
1-Hexadecylamine	6.78_242.2832m/z		242.283	6.78	0.176	1	143-27-1	2	M+H	C16H35N	40.5	12.1	4.2	95.3
1H-Indole-4-carboxaldehyde	4.79_146.0593m/z		146.059	4.79	0.154	8	1074-86-8	1	M+H	C9H7NO	57.2	93.7	5.2	98.1
1-Linoleoyl-2-stearoyl-sn-glycero-3-phospho-(1'-sn-glycerol)	7.93_797.5237m/z		797.524	7.93	0.546	4	1221487-94-0	2	M+Na	C42H79O10P	40.5	37.7	8.5	74.4
1-Phenyl-2-decanoylamino-3-morpholino-1-propanol	5.92_391.2944m/z		391.294	5.92	0.247	2	73257-80-4	2	M+H	C23H38N2O3	43.7	26.7	2.9	95.1
1-Stearoyl-2-hydroxy-sn-glycero-3-phosphoethanolamine	5.34_464.3224m/z		464.322	5.34	0.709	2	69747-55-3	2	M+H-H2O	C23H48NO7P	44.4	51.1	18.3	89.4
2-(2-Butoxyethoxy)acetic acid	3.55_177.1114m/z		177.111	3.55	0.183	2	82941-26-2	2	M+H	C8H16O4	43.9	26.2	4.2	98.1
2',4'-Dimethoxychalcone	4.17_269.1126m/z		269.113	4.17	0.153	20	1154-77-4	2	M+H	C17H16O3	44.6	46	17.1	94.5
2,5-Di-tert-butyl-1,4-benzoquinone	8.25_221.1527m/z		221.153	8.25	0.171	3	2460-77-7	2	M+H	C14H20O2	40.8	15.3	4.1	93.4
2-Amino-1-phenylethanol	2.17_120.0803m/z		120.08	2.17	0.287	8	7568-93-6	2	M+H-H2O	C8H11NO	40.3	5.98	3.1	99.3
2-Hydroxyestradiol	5.17_289.1792m/z		289.179	5.17	0.204	4	362-05-0	2	M+H	C18H24O3	41	20.8	2	86.7
2-Methylresorcinol	2.96_125.0590m/z		125.059	2.96	0.17	11	608-25-3	2	M+H	C7H8O2	40.4	11.5	5.9	97.3
2-Propyl-4-pentenoic acid	6.48_143.1066m/z		143.107	6.48	0.127	7	117039-61-9	2	M+H	C8H14O2	44.7	31.1	0.7	93.4
3alpha-Mannobiose	1.03_325.1124m/z		325.112	1.03	0.195	49	23745-85-9	2	M+H-H2O	C12H22O11	42.7	20.2	1.4	95
3-Hydroxycapric acid	7.49_171.1371m/z		171.137	7.49	0.377	8	5561-87-5	2	M+H-H2O	C10H20O3	43	26.3	4.7	93.9
3-Hydroxyoctadecanoic Acid	8.64_300.2650n	300.265	283.262	8.64	2.047	1	17773-30-7	2	M+H-H2O, M+K, M+H	C18H36O3	53.2	75.6	4.7	95.8
3-Methoxyprostaglandin F1alpha	9.43_369.2601m/z		369.26	9.43	0.094	9	54432-43-8	2	M+H-H2O	C21H38O6	40.7	23.6	8.9	89.7
3-Methylphenylacetic acid	5.87_151.0745m/z		151.075	5.87	0.1	10	621-36-3	2	M+H	C9H10O2	43.5	25.2	5.8	99.2
3-Phenoxy-1-propanol	4.73_153.0903m/z		153.09	4.73	0.205	3	6180-61-6	2	M+H	C9H12O2	48	54.2	4.9	91.3
4-(2-Amino-1-hydroxyethyl)-2-methoxyphenol	3.26_166.0855m/z		166.085	3.26	0.229	4	97-31-4	2	M+H-H2O	C9H13NO3	42.2	19.4	3.9	96.1
4-Chromanone	2.17_148.0517n	148.052	149.059	2.17	0.216	3	491-37-2	2	M+H-H2O, M+H	C9H8O2	43.5	26.7	5.1	96.9
4-Hydroxybenzaldehyde	1.30_123.0435m/z		123.043	1.3	0.17	7	123-08-0	2	M+H	C7H6O2	51.4	63.6	4.9	99.2
4-Hydroxynonenal	5.40_156.1142n	156.114	139.111	5.4	0.178	1	75899-68-2	2	M+H-H2O, M+H	C9H16O2	51	65.1	5.3	96.1
4-Imidazoleacetic acid	1.57_127.0495m/z		127.049	1.57	0.17	6	645-65-8	1	M+H	C5H6N2O2	39.4	6.33	5.2	96.9
4-Imidazoleacrylic acid	1.06_138.0423n	138.042	139.05	1.06	0.219	4	104-98-3	2	M+H, M+Na, M+K, M+H-H2O	C6H6N2O2	46.3	37.3	4.4	99.4
5,6-Epoxy-8Z,11Z,14Z-eicosatrienoic acid	8.16_303.2303m/z		303.23	8.16	0.44	28	184488-43-5	2	M+H-H2O	C20H32O3	45.3	36.3	4.8	96
5-Aminolevulinic acid	1.01_132.0650m/z		132.065	1.01	0.413	6	106-60-5	1	M+H	C5H9NO3	54	78.4	3.9	96.2
5S,12S-Dihydroxy-6Z,8E,10E,14Z-eicosatetraenoic acid	6.68_359.2174m/z		359.217	6.68	1.16	32	83709-73-3	2	M+Na	C20H32O4	48.2	57.2	5.6	90.3
6-Ketoprostaglandin F1alpha	5.77_393.2242m/z		393.224	5.77	1.235	14	58962-34-8	2	M+Na	C20H34O6	40.7	18.3	1.6	87.2
6-Octadecenoic acid, (Z)-	10.26_282.2551n	282.255	265.252	10.26	0.503	7	593-39-5	2	M+H-H2O, M+H	C18H34O2	49.6	55.7	2.9	95.8
7-Hydroxychromanone	1.30_164.0470n	164.047	165.054	1.3	0.218	4	5631-67-4	2	M+H-H2O, M+H	C9H8O3	47.6	41.4	1.9	98.9
7-Keto-8-aminopelargonic acid	4.12_187.1204n	187.12	170.117	4.12	0.283	1	4707-58-8	2	M+H-H2O, M+H, M+K, M+Na	C9H17NO3	46.1	34.4	2.4	99
8,12-iso-iPF2alpha-VI 1,5- lactone	7.54_336.2270n	336.227	337.234	7.54	0.72	26	b26Q77UBTY1KbE6	2	M+H, M+Na	C20H32O4	46	44	9	95.9
8-Iso-16-cyclohexyl-tetranor prostaglandin E2	6.63_378.2385n	378.238	361.235	6.63	1.107	2	53319-30-5	2	M+H-H2O, M+Na	C22H34O5	42.7	37.1	5.5	82.7
9-Octadecenamide, (Z)-	9.69_281.2710n	281.271	282.278	9.69	0.378	2	301-02-0	2	M+H, M+Na	C18H35NO	56.7	89.1	3.2	98.1
9-Oxo-10E,12Z-octadecadienoic acid	8.08_294.2189n	294.219	295.226	8.08	0.394	6	54232-59-6	2	M+H-H2O, M+H	C18H30O3	53.8	74.4	2.1	97.2
9-Oxo-11R,15S-dihydroxy-1a,1b-dihomo-13E-prostaenoic acid	7.74_365.2664m/z		365.266	7.74	0.301	14	23452-98-4	2	M+H-H2O	C22H38O5	40.8	18.3	5.9	92.7
9-Oxo-15S-hydroxy-5Z,8(12),13E,17Z-prostatetraenoic acid	6.60_333.2031m/z		333.203	6.6	1.46	23	36614-32-1	2	M+H	C20H28O4	42.7	27.3	8.8	95.9
9-OxoOTrE	7.54_293.2095m/z		293.209	7.54	1.019	7	125559-74-2	2	M+H	C18H28O3	45.6	38	5.7	96.3
9-Oxo-prosta-5Z,10,12Z,14E-tetraenoic acid	8.25_316.2008n	316.201	317.208	8.25	1.112	2	112839-31-3	2	M+H, M+Na	C20H28O3	40.1	15.8	9.7	95.5
9S,11R,15S-Trihydroxy-20a,20b-dihomo-5Z,13E-prostadienoic acid	8.11_365.2669m/z		365.267	8.11	0.221	15	36950-85-3	2	M+H-H2O	C22H38O5	51.7	73.4	4.6	90.4
9S,11S,15S-Trihydroxy-2,3-dinor-5Z,13E-prostadienoic acid	5.77_309.2042m/z		309.204	5.77	0.297	5	221664-05-7	2	M+H-H2O	C18H30O5	49.6	60.4	5.8	94.3
Ala-Ala-Lys	1.06_289.1862m/z		289.186	1.06	0.122	1	nKFWRd7P0WtkDM0	2	M+H	C12H24N4O4	41.9	15.5	2.8	97.6
Allopurinol	1.16_136.0381n	136.038	137.045	1.16	0.219	3	315-30-0	2	M+H, M+Na	C5H4N4O	41.9	16	3.1	97.3
Arachidonoyl amide	9.08_304.2624m/z		304.262	9.08	0.19	5	85146-53-8	2	M+H	C20H33NO	47.8	48.8	3.5	94.4
Arachidonoylglycine	5.01_384.2565m/z		384.257	5.01	0.05	2	179113-91-8	2	M+Na	C22H35NO3	45.8	58.7	15.5	86.3
Arachidonoylserinol	9.29_378.2984m/z		378.298	9.29	0.283	2	183718-70-9	2	M+H	C23H39NO3	43.6	28.5	4.9	95.1
Arg-Pro-Pro	5.80_369.2227m/z		369.223	5.8	0.223	15	01c2G0nEGpftaxG	2	M+H	C16H28N6O4	45	43.7	4.7	86.6
Asn-Gly-Arg	3.91_346.1874m/z		346.187	3.91	0.209	6	0OGz0S3kjFHu5MN	2	M+H	C12H23N7O5	44.9	52.4	11.6	84.4
Asn-Pro	6.68_230.1122m/z		230.112	6.68	0.126	9	Hi-yO85Ap@01DFl	2	M+H	C9H15N3O4	44.2	28.8	5.7	98.5
Asn-Pro-Lys	3.75_358.2069m/z		358.207	3.75	0.418	6	4thmIh3sKFWS@Xa	2	M+H	C15H27N5O5	49.3	54.5	4.5	97.2
Asp-Ala-Arg	4.27_361.1832m/z		361.183	4.27	1.393	8	SEMSR0w0NbtwtzZ	2	M+H	C13H24N6O6	45.5	69.4	0.6	58.7
Asp-Met-Arg	4.73_420.1735n	420.173	421.181	4.73	0.154	2	8ljTlTzqxn9HJn6	2	M+H, M+Na, M+K, M+H-H2O	C15H28N6O6S	46.4	49.5	13.4	96.4
Azelaic acid	4.73_188.1041n	188.104	171.101	4.73	0.359	2	123-99-9	1	M+H-H2O, M+Na, M+K, M+H	C9H16O4	40.8	9.73	4	99.1
Benzeneethanamine	2.96_122.0963m/z		122.096	2.96	0.343	8	64-04-0	2	M+H	C8H11N	55.5	85.2	0.8	93.4
Benzenemethanol, 4-methyl-	5.47_105.0694m/z		105.069	5.47	0.203	7	589-18-4	2	M+H-H2O	C8H10O	51	66.9	4.2	92.8
Bimatoprost serinol amide	4.32_444.2788m/z		444.279	4.32	0.385	4	1175838-84-2	2	M+H-H2O	C26H39NO6	41.8	34.8	9.4	84.5
Biotin	3.29_245.0990m/z		245.099	3.29	0.129	6	58-85-5	1	M+H	C10H16N2O3S	41.5	30.9	14.7	91.7
Bisindolylmaleimide I	6.25_413.1977m/z		413.198	6.25	0.226	16	133052-90-1	2	M+H	C25H24N4O2	47.7	46.8	1.3	93.3
Butylated hydroxyanisole	7.01_181.1215m/z		181.121	7.01	0.226	3	25013-16-5	2	M+H	C11H16O2	41.1	15.7	4.6	95.1
Carvacrol	8.08_151.1109m/z		151.111	8.08	0.246	13	499-75-2	2	M+H	C10H14O	41.8	21.8	5.8	93.7
CAY10410	7.89_319.2237m/z		319.224	7.89	0.596	50	596104-94-8	2	M+H	C20H30O3	44.1	36.8	9.8	94.2
cis-5,8,11,14,17-Eicosapentaenoic acid	7.98_302.2236n	302.224	303.231	7.98	2.355	5	10417-94-4	2	M+H-H2O, M+H	C20H30O2	42.7	22	3.2	95.3
cis-7,10,13,16,19-Docosapentaenoic acid	8.59_331.2622m/z		331.262	8.59	0.513	6	24880-45-3	2	M+H	C22H34O2	45.1	29.6	2.8	99.3
cis-9-Hexadecenoic acid	9.48_254.2250n	254.225	237.222	9.48	0.188	3	373-49-9	2	M+H-H2O, M+H	C16H30O2	50.1	65.9	1.6	86.5
Conjugated linoleic acid (9E,11E)	8.33_281.2465m/z		281.247	8.33	0.539	6	544-71-8	2	M+H	C18H32O2	57.1	92.8	3.6	96.8
Curcumol	7.89_237.1841m/z		237.184	7.89	0.47	3	4871-97-0	2	M+H	C15H24O2	42.5	25.9	3.5	90.9
Cys-Asn-Arg	8.08_392.1721m/z		392.172	8.08	0.122	3	24OMGjECjGkBWBy	2	M+H	C13H25N7O5S	40.6	22.9	2.6	83.1
Cys-Asn-Lys	2.22_364.1593m/z		364.159	2.22	0.287	5	ZfnoajpYzQ9pkN5	2	M+H	C13H25N5O5S	43.5	39.8	15.4	93.4
Cys-Lys-Lys	1.67_378.2222m/z		378.222	1.67	0.121	2	QMara@9WBIllyMV	2	M+H	C15H31N5O4S	45.3	47.8	13.8	93.1
Decanedioic acid, bis(2-ethylhexyl) ester	8.28_449.3616m/z		449.362	8.28	0.366	2	122-62-3	2	M+Na	C26H50O4	40.4	10.5	3.5	95.8
D-erythro-Sphingosine C-15	7.61_258.2418m/z		258.242	7.61	0.125	1	86555-28-4	2	M+H	C15H31NO2	46.2	43.1	3.8	92.6
D-erythro-Sphingosine C-20	10.24_328.3198m/z		328.32	10.24	0.171	2	6918-49-6	2	M+H	C20H41NO2	41.3	26.5	3.7	84.3
Dibutyl sebacate	7.01_314.2451n	314.245	337.234	7.01	0.606	4	109-43-3	2	M+Na, M+K, M+H	C18H34O4	40.1	4.9	1.9	98
Diethyltoluamide	7.61_192.1375m/z		192.137	7.61	0.125	3	134-62-3	2	M+H	C12H17NO	41.4	13.3	4.3	98.6
Dihydrocapsaicin	7.61_307.2142n	307.214	308.221	7.61	0.225	1	19408-84-5	2	M+H, M+Na, M+K, M+H-H2O	C18H29NO3	40.7	9.29	1.9	96.6
DL-Indole-3-lactic acid	3.29_188.0701m/z		188.07	3.29	0.154	9	832-97-3	2	M+H-H2O	C11H11NO3	52.9	70	2.3	97.1
DL-Norepinephrine	2.96_152.0699m/z		152.07	2.96	0.194	14	138-65-8	2	M+H-H2O	C8H11NO3	43.4	23.5	4.4	98.6
DL-Octopamine	1.30_136.0751m/z		136.075	1.3	0.218	6	104-14-3	2	M+H-H2O	C8H11NO2	52.2	66.3	3.8	99.1
DL-Phenylalanine	2.17_165.0786n	165.079	166.086	2.17	0.287	3	150-30-1	2	M+H, M+Na	C9H11NO2	58.8	97.6	2.2	99.2
Docosahexaenoic acid ethyl ester	7.31_357.2780m/z		357.278	7.31	0.152	4	1020718-25-5	2	M+H	C24H36O2	50.3	58.2	2.2	96
D-Pipecolinic acid	0.91_130.0856m/z		130.086	0.91	0.145	4	1723-00-8	2	M+H	C6H11NO2	47.5	46.9	5.3	96.8
Equol	1.37_242.0897n	242.09	243.097	1.37	0.243	1	94105-90-5	2	M+H-H2O, M+H	C15H14O3	40.1	23.6	18.9	95.6
Estrone	6.55_271.1695m/z		271.17	6.55	0.101	7	53-16-7	1	M+H	C18H22O2	37.3	2.74	0.8	84.5
Gln-Leu-Lys	3.83_388.2541m/z		388.254	3.83	0.157	5	NDGv90uUMKa@Vo7	2	M+H	C17H33N5O5	51.4	64.2	3.6	97.2
Glu-Thr	5.40_249.1092m/z		249.109	5.4	0.152	4	5woUT-HM-d8l@tu	2	M+H	C9H16N2O6	41.9	16.6	4.5	98.3
Glycyl-L-4-Hydroxyproline	1.13_171.0758m/z		171.076	1.13	0.17	3	24587-32-4	2	M+H-H2O	C7H12N2O4	43.9	29	3.5	94.9
Gly-Leu	2.82_189.1226m/z		189.123	2.82	0.216	8	869-19-2	2	M+H	C8H16N2O3	55.4	86.7	3.9	95
Gly-Phe	3.23_223.1069m/z		223.107	3.23	0.05	3	t0YvONJW59MBnnL	2	M+H	C11H14N2O3	45.8	35.5	3.5	97.5
Gly-Pro	1.08_172.0842n	172.084	173.091	1.08	0.437	1	704-15-4	2	M+H, M+Na, M+H-H2O	C7H12N2O3	44.6	34.1	3.6	93
Heptadecasphing-4-enine	9.29_268.2625m/z		268.262	9.29	0.166	1	6918-48-5	2	M+H-H2O	C17H35NO2	43.2	23.6	3.6	96.6
Heptanoic acid, ethyl ester	7.21_158.1297n	158.13	159.137	7.21	0.126	2	106-30-9	2	M+H, M+K	C9H18O2	45.9	38.6	6.3	98.1
His-Ala-Arg	8.13_383.2197m/z		383.22	8.13	0.32	13	#NAME?	2	M+H	C15H26N8O4	41	25.8	12.4	92.5
His-Gln	3.36_284.1336m/z		284.134	3.36	0.13	9	ZoZFZIsSxaRqjMj	2	M+H	C11H17N5O4	43	24.4	6.2	97.4
His-Met-Arg	4.04_442.2059n	442.206	465.195	4.04	0.13	3	5lr@8FtPg52H62m	2	M+Na, M+K, M+H	C17H30N8O4S	41.8	45.3	11.6	76
Ile-Asp-Lys	9.50_375.2255m/z		375.226	9.5	0.164	7	6hS3YogSSzQ5O3w	2	M+H	C16H30N4O6	43.9	33	4.6	91.8
Ile-Met-Lys	7.86_391.2445m/z		391.245	7.86	0.175	12	LfR9xRxYveYpMQU	2	M+H	C17H34N4O4S	44.4	54.6	18.2	85.5
Ile-Pro	3.16_229.1536m/z		229.154	3.16	0.306	6	46835bpk3eWp5po	2	M+H	C11H20N2O3	42.3	18.8	4.6	97.8
Jasmine lactone	8.42_169.1215m/z		169.121	8.42	0.318	3	25524-95-2	2	M+H	C10H16O2	51.5	66.6	4.7	96.2
Jasmonic acid	7.28_211.1320m/z		211.132	7.28	0.278	5	77026-92-7	2	M+H	C12H18O3	50.1	58.4	3.9	96.9
Kifunensine	4.73_232.0684n	232.068	233.076	4.73	0.18	1	109944-15-2	2	M+H, M+Na	C8H12N2O6	44	27.7	4.9	97.9
L-Arginine	0.94_175.1182m/z		175.118	0.94	0.097	3	74-79-3	2	M+H	C6H14N4O2	56.5	90.7	4.1	96.7
L-Arginine-7-amido-4-methylcoumarin	3.91_332.1697m/z		332.17	3.91	0.26	3	65286-27-3	2	M+H	C16H21N5O3	42	35.1	6.1	81.9
L-Carnitine	0.99_161.1046n	161.105	162.112	0.99	0.17	1	541-15-1	2	M+H, M+Na	C7H15NO3	46.5	38.6	3.9	98.5
L-Citrulline	1.01_176.1023m/z		176.102	1.01	0.195	2	372-75-8	1	M+H	C6H13N3O3	41	12.4	4.1	97.6
Leukotriene B3	7.39_361.2336m/z		361.234	7.39	0.855	17	88099-35-8	2	M+Na	C20H34O4	45.3	42.1	4	89.1
L-Glutamic acid	1.30_130.0491m/z		130.049	1.3	0.194	9	56-86-0	1	M+H-H2O	C5H9NO4	56.5	89.7	4.9	98.6
Linolenic acid ethyl ester	8.50_306.2549n	306.255	307.262	8.5	0.538	6	1191-41-9	2	M+H-H2O, M+H	C20H34O2	49.2	51.2	3.4	98.8
L-Isoleucine	1.54_132.1014m/z		132.101	1.54	0.339	7	73-32-5	2	M+H	C6H13NO2	56.3	87.8	3.8	98.3
L-Leucine, N-acetyl	4.63_173.1046n	173.105	174.112	4.63	0.384	4	1188-21-2	2	M+H-H2O, M+H	C8H15NO3	41.7	19.1	3.6	93.4
L-Proline	1.03_116.0701m/z		116.07	1.03	0.316	1	147-85-3	2	M+H	C5H9NO2	40.1	6.13	4.5	99.4
L-Tyrosine	1.30_181.0736n	181.074	182.081	1.3	0.194	2	60-18-4	1	M+H, M+Na	C9H11NO3	55.6	81.1	1.8	98.9
Lys-Asn	5.09_261.1588m/z		261.159	5.09	0.178	10	gPHpxTl21YjS35N	2	M+H	C10H20N4O4	45.4	55.2	11.8	84.5
Lys-Ser-Lys	3.70_344.2277m/z		344.228	3.7	0.235	1	lNtWuSeB4anmR0C	2	M+H-H2O	C15H31N5O5	45.3	34.5	4.2	96.7
Met-Cys	4.76_252.0563n	252.056	253.064	4.76	0.154	1	hl059P5x1r22dlR	2	M+H, M+Na	C8H16N2O3S2	41.8	37.4	15.8	87.6
Met-Ser-Lys	3.55_365.1784m/z		365.178	3.55	0.235	8	XpyqpWucIkAsMXz	2	M+H	C14H28N4O5S	41.2	46.5	18.9	78.1
Misoprostol, free acid	7.64_368.2559n	368.256	391.245	7.64	0.225	3	112137-89-0	2	M+H, M+Na	C21H36O5	40.2	12.5	1.1	90.1
Monoelaidin	9.83_356.2915n	356.291	379.281	9.83	0.166	2	2716-53-2	2	M+H-H2O, M+Na	C21H40O4	44.9	35.8	3.2	92.3
Monolauryl phosphate	5.01_289.1550m/z		289.155	5.01	0.099	6	2627-35-2	2	M+Na	C12H27O4P	40.4	9.11	3.9	97.3
Monopalmitolein (9c)	9.08_328.2605n	328.26	329.268	9.08	0.166	1	37515-61-0	2	M+H, M+Na	C19H36O4	51.7	71.4	2.6	90.1
Myristic acid alkyne	8.33_207.1735m/z		207.173	8.33	0.44	3	82909-47-5	2	M+H-H2O	C14H24O2	48	53.4	3.9	91.2
N-(4-Hydroxyphenyl)propanamide	4.17_166.0856m/z		166.086	4.17	0.205	6	1693-37-4	2	M+H	C9H11NO2	45	34.6	4.1	95.1
N,N-Dimethyl-L-valine	2.96_146.1171m/z		146.117	2.96	0.145	1	2812-32-0	2	M+H	C7H15NO2	56.5	89.1	3.2	97
N-alpha-Acetyl-L-arginine	1.28_217.1281m/z		217.128	1.28	0.122	1	155-84-0	2	M+H	C8H16N4O3	47.8	53.5	6.4	92.8
N-3-Oxotetradec-7Z-enoyl-L-homoserine lactone	4.71_324.2164m/z		324.216	4.71	0.359	2	482598-46-9	2	M+H	C18H29NO4	49.3	54.9	1.5	93.5
N-Acetylneuraminic Acid, 2,3-Dehydro-2-deoxy-	1.06_291.0949n	291.095	274.092	1.06	0.34	2	24967-27-9	2	M+H-H2O, M+H, M+Na	C11H17NO8	43.6	25.6	1.6	94.6
Nandrolone	6.70_257.1887m/z		257.189	6.7	0.277	1	434-22-0	2	M+H-H2O	C18H26O2	40.4	10.8	4.7	96.5
N-cis-Tetradec-9-enoyl-L-homoserine lactone	8.55_310.2367m/z		310.237	8.55	0.316	1	HJ84KbEOefGl0cZ	2	M+H	C18H31NO3	43.8	35.5	3.3	87.5
Nialamide	4.61_298.1413n	298.141	321.13	4.61	0.385	1	51-12-7	2	M+Na, M+K, M+H	C16H18N4O2	40.1	11.1	5.8	95.9
Nicotinic acid	1.18_124.0386m/z		124.039	1.18	0.121	5	59-67-6	2	M+H	C6H5NO2	44.9	32.6	5.8	98.8
N-Methylbenzamide	1.74_136.0749m/z		136.075	1.74	0.241	5	613-93-4	2	M+H	C8H9NO	40.2	13.9	6.1	94.1
N-Octanoyl-L-homoserine lactone	5.11_227.1514n	227.151	210.148	5.11	0.278	2	147852-84-4	2	M+H-H2O, M+H, M+Na	C12H21NO3	44.9	31.8	3.2	96.6
N-Oleoylethanolamine	9.39_325.2970n	325.297	326.304	9.39	0.165	1	111-58-0	2	M+H, M+Na	C20H39NO2	49.8	55.1	3.3	97.5
N-Oleoylglycine	9.34_340.2832m/z		340.283	9.34	0.189	2	2601-90-3	2	M+H	C20H37NO3	42.7	25.2	4	93.1
Norharmane	3.81_169.0755m/z		169.076	3.81	0.131	3	244-63-3	2	M+H	C11H8N2	44.4	28.4	2.8	96.8
N-Palmitoylglycine	9.24_314.2678m/z		314.268	9.24	0.284	2	2441-41-0	2	M+H	C18H35NO3	45.2	34.3	3.7	96
N-Tetradecanoyl-L-homoserine Lactone	8.23_312.2528m/z		312.253	8.23	0.317	3	202284-87-5	2	M+H	C18H33NO3	42.9	24.7	1.8	91.8
Octabenzone	3.70_326.1939n	326.194	327.201	3.7	0.392	7	1843-05-6	2	M+H, M+Na	C21H26O3	41.8	32.7	17.5	94.1
Oleanolic acid	7.01_439.3633m/z		439.363	7.01	0.201	4	508-02-1	2	M+H-H2O	C30H48O3	44.2	36.7	13.7	98.5
O-Methyltyramine	4.12_152.1064m/z		152.106	4.12	0.179	5	55-81-2	2	M+H	C9H13NO	42.6	26	3.6	91.4
Ononin	4.73_430.1286n	430.129	431.136	4.73	0.129	2	486-62-4	2	M+H, M+K	C22H22O9	42.1	29.6	5.1	86.9
Palmitamide	9.72_255.2553n	255.255	256.263	9.72	0.236	1	629-54-9	2	M+H, M+Na	C16H33NO	41	11	3.6	98.3
Palmitoleoyl ethanolamide	8.30_298.2728m/z		298.273	8.3	0.44	1	94421-67-7	2	M+H	C18H35NO2	44.2	36.6	4.3	89.3
Palmitoyl ethanolamide	9.27_299.2814n	299.281	300.289	9.27	0.166	3	544-31-0	2	M+H, M+Na	C18H37NO2	48	47.6	3.4	96.4
p-Hydroxyphenyllactic acid	3.11_165.0539m/z		165.054	3.11	0.274	13	306-23-0	2	M+H-H2O	C9H10O4	41.3	16.9	3.9	94
Phytomonic acid	10.74_297.2772m/z		297.277	10.74	0.121	2	503-06-0	2	M+H	C19H36O2	41.8	30.7	5.4	84.4
Phytosphingosine	5.90_300.2893m/z		300.289	5.9	0.348	4	554-62-1	2	M+H-H2O	C18H39NO3	44.3	23.6	1.4	99.5
Pinolenic acid	7.89_278.2241n	278.224	279.231	7.89	0.869	2	16833-54-8	2	M+H, M+Na, M+K, M+H-H2O	C18H30O2	56.2	84.6	1.7	98.3
Piperine	3.11_286.1397m/z		286.14	3.11	0.471	8	94-62-2	2	M+H	C17H19NO3	41.6	32.2	14.3	90.6
Pregabalin	3.70_159.1254n	159.125	160.133	3.7	0.157	2	148553-50-8	2	M+H, M+Na	C8H17NO2	48.1	48.7	3.6	96
Pro-Leu	1.18_229.1537m/z		229.154	1.18	0.364	6	v8tjdNm4tVJRTgR	2	M+H	C11H20N2O3	41.9	17.1	4.2	97.4
Prostaglandin D1	6.58_377.2296m/z		377.23	6.58	1.054	18	17968-82-0	2	M+Na	C20H34O5	40.8	24.5	0.8	80.5
Prostaglandin D1 alcohol	6.25_323.2567m/z		323.257	6.25	0.201	12	1176470-37-3	2	M+H-H2O	C20H36O4	48.4	50.7	3.9	95.8
Prostaglandin F2alpha dimethylamine	9.67_368.3147m/z		368.315	9.67	0.118	2	67508-09-2	2	M+H	C22H41NO3	41	22.3	3.2	86.6
Prostaglandin H2	6.15_352.2218n	352.222	353.229	6.15	1.208	21	42935-17-1	2	M+H, M+Na	C20H32O5	44.4	37.1	9	95
Prostaglandin K1	6.83_335.2187m/z		335.219	6.83	0.556	41	69413-73-6	2	M+H-H2O	C20H32O5	50	63.5	8.5	95.8
Pro-Thr-Lys	6.02_345.2117m/z		345.212	6.02	0.325	9	SFmqSYFvPfni89Q	2	M+H	C15H28N4O5	41.9	49.5	4.5	65.1
p-tert-Octylphenol diglycol ether	5.70_294.2187n	294.219	295.226	5.7	2.573	6	2315-61-9	2	M+H-H2O, M+H	C18H30O3	44.1	27.8	2.5	95.7
p-tert-Octylphenol triglycol ether	6.88_339.2493m/z		339.249	6.88	1.156	16	2315-62-0	2	M+H	C20H34O4	43.9	47	10.8	84.3
p-Toluenesulfonic acid	5.87_155.0156m/z		155.016	5.87	0.173	3	104-15-4	2	M+H-H2O	C7H8O3S	45.4	32	2.8	98.4
Pyridoxamine	2.19_169.0964m/z		169.096	2.19	0.263	9	85-87-0	2	M+H	C8H12N2O2	40.5	10.9	4.6	96.7
PyroGlu-Ala	1.11_200.0792n	200.079	201.087	1.11	0.243	2	mAkmyjUq0VVvstF	2	M+H, M+Na	C8H12N2O4	41.4	12.6	2.6	97.4
PyroGlu-Ala-Lys	3.44_328.1746n	328.175	351.164	3.44	0.313	2	beE3g3mwHcWEYEq	2	M+H, M+Na	C14H24N4O5	42.6	25.1	0.3	88.2
PyroGlu-Asn-Lys	3.78_372.1863m/z		372.186	3.78	0.183	6	Km5SC2KhXHTIYsm	2	M+H	C15H25N5O6	47.6	49.5	4	92.9
PyroGlu-Ile-Lys	3.47_371.2276m/z		371.228	3.47	0.105	13	gIu9gA4gCWQb9nj	2	M+H	C17H30N4O5	48.1	47.9	3.6	97
PyroGlu-Met	1.30_260.0825n	260.082	261.09	1.3	0.17	1	pDO0D7tFF-@hFqB	2	M+H, M+Na	C10H16N2O4S	40	8.42	2	94.2
PyroGlu-Pro	1.40_227.1019m/z		227.102	1.4	0.339	9	CgY4@3c4JFdsf8w	2	M+H	C10H14N2O4	41.8	19.4	3.5	93.9
PyroGlu-Ser-Lys	1.08_345.1789m/z		345.179	1.08	0.8	4	#NAME?	2	M+H	C14H24N4O6	45.1	53.2	6	79.2
PyroGlu-Tyr	3.36_293.1128m/z		293.113	3.36	0.13	11	YlVy8eUNxAcIzzp	2	M+H	C14H16N2O5	44	25	1.5	96.9
R-(-)-Phenyl-1,2-ethanediol	1.35_121.0641m/z		121.064	1.35	0.194	12	16355-00-3	2	M+H-H2O	C8H10O2	50.5	59.9	5.1	98.6
Sebacic acid	6.00_203.1278m/z		203.128	6	0.173	4	111-20-6	1	M+H	C10H18O4	41.4	10.8	0.2	96.3
Ser-Asn	5.52_202.0811m/z		202.081	5.52	0.229	11	W3JNL43xAWkpoBj	2	M+H-H2O	C7H13N3O5	41	14.8	5.3	96.5
Ser-Asp-Arg	7.06_376.1736n	376.174	377.181	7.06	0.403	2	WqJfd9wlNTjrpR0	2	M+H, M+Na	C13H24N6O7	43.5	28.5	7.7	97.6
Stearidonic acid	7.49_277.2154m/z		277.215	7.49	0.452	13	20290-75-9	2	M+H	C18H28O2	52.9	72.4	2.9	95.7
Suberic acid	6.40_157.0850m/z		157.085	6.4	0.627	4	505-48-6	2	M+H-H2O	C8H14O4	46.1	49.5	5.3	87
Sucrose	1.01_365.1053m/z		365.105	1.01	0.219	25	57-50-1	2	M+Na	C12H22O11	45.3	28.2	0.4	98.9
Terbutaline	4.38_225.1357n	225.136	226.143	4.38	0.18	2	23031-25-6	2	M+H, M+Na	C12H19NO3	42.7	24.9	3.4	92.5
Testosterone enanthate	6.22_400.2969n	400.297	401.304	6.22	0.15	1	315-37-7	2	M+H, M+Na	C26H40O3	47	46.1	2.1	91.2
Thymol	6.40_151.1109m/z		151.111	6.4	0.429	12	89-83-8	2	M+H	C10H14O	48.6	53.5	5.8	96
trans,cis-3,6-Nonadien-1-ol	5.34_140.1193n	140.119	123.116	5.34	0.28	1	56805-23-3	2	M+H-H2O, M+H	C9H16O	43.8	29.9	5.5	95.4
trans-Zeatin	2.77_220.1173m/z		220.117	2.77	0.167	3	1637-39-4	2	M+H	C10H13N5O	44	36.8	9.2	93.2
Trp-Ala-Arg	7.06_432.2375m/z		432.238	7.06	0.15	8	D0ynvdAeFUfFfBA	2	M+H	C20H29N7O4	52.5	70	5	98.4
Trp-Pro-Arg	4.50_458.2564m/z		458.256	4.5	0.128	2	99z9lChHa8vCAzZ	2	M+H	C22H31N7O4	42.9	43.2	11.8	84.1
Tyr-Tyr	3.11_345.1448m/z		345.145	3.11	0.304	4	8FZrE2XQJkdZbVW	2	M+H	C18H20N2O5	40.3	11.7	0.8	90.5
Undecanedioic acid	5.52_216.1355n	216.136	199.132	5.52	0.254	2	1852-04-6	2	M+H-H2O, M+K, M+Na, M+H	C11H20O4	40.1	5.28	3.3	98.9
Undecapropylene glycol monobutyl ether	10.38_712.5332n	712.533	735.522	10.38	1.812	1	mQ6QalAyq4Dn6dD	2	M+Na, M+K	C37H76O12	41.2	7.89	0.7	98.8
Uracil	1.16_113.0338m/z		113.034	1.16	0.146	2	66-22-8	2	M+H	C4H4N2O2	49.7	60	6.6	96.2
Val-Arg-Lys	5.42_402.2829m/z		402.283	5.42	0.481	5	ybe2Ona2LArGpfv	2	M+H	C17H35N7O4	43.9	38	1.5	83.2
Val-Glu-Arg	5.04_403.2307m/z		403.231	5.04	0.125	13	ooiVBbzow7qMJgn	2	M+H	C16H30N6O6	42.3	31.1	1.8	82.5
Val-Pro-Arg	1.57_371.2392m/z		371.239	1.57	0.17	21	mSd0WstFK-hswXp	2	M+H	C16H30N6O4	40.9	13.2	2.5	94.3
Val-Val	1.47_217.1539m/z		217.154	1.47	0.194	2	3918-94-3	2	M+H	C10H20N2O3	41.9	16.6	3.4	97
Val-Val-Arg	1.74_373.2548m/z		373.255	1.74	0.145	9	gmdbnekIjCoGHw0	2	M+H	C16H32N6O4	40.8	18.7	2.6	88.6

## Sheet: C18 ESI-
Assigned Annotation	Compound	Neutral mass (Da)	m/z	Retention time (min)	Chromatographic peak width (min)	Identifications	Identifier	MSI Classification	Adducts	Formula	Score	Fragmentation Score	Abs Mass Error (ppm)	Isotope Similarity
(+/-)-2-Hydroxyoctanoic acid	5.59_159.1022m/z		159.102	5.59	0.152	4	617-73-2	2	M-H	C8H16O3	45.5	38	2.7	92.8
(+/-)-5-Hydroxy-6E,8Z,11Z,14Z,17Z-eicosapentaenoic acid	7.87_317.2103m/z		317.21	7.87	0.529	40	83952-40-3	2	M-H	C20H30O3	44.2	32.7	6.1	95
(+-)-2-cis-4-trans-Abscisic acid	6.01_263.1283m/z		263.128	6.01	0.225	5	14375-45-2	2	M-H	C15H20O4	40.1	6.68	2.3	96.7
(2S)-OMPT	6.11_465.2462m/z		465.246	6.11	0.15	3	645408-61-3	2	M-H	C22H43O6PS	42.7	26.9	3.5	90.9
(3-Phenylpropionyl)glycine	4.63_206.0817m/z		206.082	4.63	0.157	7	56613-60-6	2	M-H	C11H13NO3	45.5	32.5	2.7	98.1
alpha-Hydroxybutyric acid	1.81_103.0396m/z		103.04	1.81	0.198	5	20016-85-7	2	M-H	C4H8O3	54.1	81.3	4.5	94.5
beta-Estradiol 3-(beta-D-glucuronide)	7.97_447.1966m/z		447.197	7.97	0.309	6	15270-30-1	2	M-H	C24H32O8	40.5	21.2	13	95.2
delta-CEHC	7.65_249.1160m/z		249.116	7.65	0.169	5	1221504-67-1	2	M-H	C14H18O4	44.6	40.7	10.9	94.1
omega-3 Arachidonic acid	9.45_303.2327m/z		303.233	9.45	0.288	9	24880-40-8	2	M-H	C20H32O2	41.8	12.7	0.9	97.6
11(12)-EET	8.16_319.2272m/z		319.227	8.16	0.862	25	123931-40-8	2	M-H	C20H32O3	48.2	47.4	2.2	96.4
11,15-Dioxo-9S-hydroxy-5Z-prostenoic acid	6.13_352.2231n	352.223	351.216	6.13	0.548	13	59894-07-4	2	M-H, M+Cl	C20H32O5	45.3	41.1	5.3	91.7
12(S)-HpEPE	7.39_333.2062m/z		333.206	7.39	0.266	33	103239-14-1	2	M-H	C20H30O4	47.5	47.3	2.8	93.6
12(S)-Hydroxy-16-heptadecynoic acid	7.22_281.2116m/z		281.212	7.22	0.368	1	148019-74-3	2	M-H	C17H30O3	42.2	17.8	2.3	95.9
12,13-DiHOME	8.35_313.2379m/z		313.238	8.35	0.476	4	263399-35-5	2	M-H	C18H34O4	55	80.2	1.8	97
12-Hydroxydodecanoic acid	6.85_216.1721n	216.172	215.165	6.85	0.173	4	505-95-3	1	M-H2O-H, M-H	C12H24O3	50.5	55.5	1.9	99.4
12S-Hydroxy-5Z,8E,10E-heptadecatrienoic acid	7.75_279.1958m/z		279.196	7.75	0.315	2	54397-84-1	2	M-H	C17H28O3	42.5	21.8	2.8	94.3
13,14-Dihydro-15(R)-prostaglandin E1	6.82_355.2483m/z		355.248	6.82	1.515	5	201848-10-4	2	M-H	C20H36O5	41.1	18.9	1.8	88.7
13,14-Dihydroprostaglandin F1alpha	6.26_357.2643m/z		357.264	6.26	0.838	1	20592-20-5	2	M-H	C20H38O5	40.8	6.13	0.9	98.9
13S-Hydroperoxy-6Z,9Z,11E-octadecatrienoic acid	6.60_310.2139n	310.214	309.207	6.6	1.185	5	121107-97-9	2	M-H2O-H, M-H	C18H30O4	40	5.82	1.5	96.1
14,15-EE-(5Z)-E	8.49_324.2660n	324.266	323.259	8.49	0.358	4	519038-92-7	2	M-H2O-H, M-H	C20H36O3	45.3	31.3	1.3	97
15(R),19(R)-Hydroxyprostaglandin F1alpha	5.38_371.2435m/z		371.243	5.38	1.904	4	oKV-fixVnF2YZjD	2	M-H	C20H36O6	40.9	17.3	1.1	88.7
15(R),19(R)-Hydroxyprostaglandin F2alpha	5.91_369.2274m/z		369.227	5.91	1.772	18	1224444-23-8	2	M-H	C20H34O6	42.2	18.3	2.4	95.7
15(S)-HpEDE	8.58_339.2533m/z		339.253	8.58	0.505	6	145375-41-3	2	M-H	C20H36O4	54.5	79.8	2.4	95.6
15(S)-HpETE	7.70_335.2217m/z		335.222	7.7	0.434	36	70981-96-3	2	M-H	C20H32O4	49.7	55.5	3.2	96.6
16,16-Dimethylprostaglandin A1	7.19_363.2531m/z		363.253	7.19	0.877	15	41692-24-4	2	M-H	C22H36O4	41.6	17.5	2.6	93.7
17,20,21-Trihydroxypregn-1-ene-3,11-dione	7.49_361.1999m/z		361.2	7.49	0.653	8	147202-58-2	2	M-H	C21H30O5	40.7	16.8	6	93.5
17-Phenyl trinor-13,14-dihydroprostaglandin A2	3.26_369.2131m/z		369.213	3.26	0.128	14	130209-80-2	2	M-H	C23H30O4	40.4	35	16	83.3
19(20)-EpDPE	7.85_343.2277m/z		343.228	7.85	0.692	18	155073-47-5	2	M-H	C22H32O3	45.6	34.6	0.5	94.2
1-Octadecanoyl-sn-glycero-3-phosphoethanolamine	5.43_480.3037m/z		480.304	5.43	0.205	2	Jf@1nvG3Wko45yU	2	M-H	C23H48NO7P	41.9	60	12.1	62.5
2,2-Dimethylglutaric acid	3.80_159.0658m/z		159.066	3.8	0.181	5	681-57-2	2	M-H	C7H12O4	44.1	28.4	2.8	95.6
2,2'-Methylene-bis(6-tert-butyl-4 methylphenol)	5.05_339.2279m/z		339.228	5.05	0.156	2	119-47-1	2	M-H	C23H32O2	40.8	22.7	14.9	96.5
2,3-Dimethylbenzoic acid	5.48_149.0603m/z		149.06	5.48	0.128	9	603-79-2	2	M-H	C9H10O2	48.6	48.2	3.3	98.7
2,6-Di-tert-butyl-4-methoxyphenol	7.49_235.1696m/z		235.17	7.49	0.12	3	489-01-0	2	M-H	C15H24O2	44.7	29.9	3.1	97.2
20-Hydroxy-(5Z,8Z,11Z,14Z)-eicosatetraenoic acid	7.99_320.2347n	320.235	319.227	7.99	1.015	15	79551-86-3	2	M-H2O-H, M-H	C20H32O3	46.7	38	1.4	96.9
2-Ethyl-2-hydroxybutyric acid	4.21_131.0709m/z		131.071	4.21	0.231	4	3639-21-2	2	M-H	C6H12O3	52.1	68.5	3.6	96.4
2-Methylbenzoic acid	3.80_135.0447m/z		135.045	3.8	0.129	13	118-90-1	2	M-H	C8H8O2	42.5	21.4	3.7	95.6
2-Phenylethanol, sulfate	1.66_201.0222m/z		201.022	1.66	0.124	4	183431-78-9	2	M-H	C8H10O4S	40.7	14.6	2.5	91.8
2-Propyl-4-pentenoic acid	4.16_141.0916m/z		141.092	4.16	0.152	6	117039-61-9	2	M-H	C8H14O2	47.2	41.9	3.3	98.1
3-(2,5-Dimethoxyphenyl)propanoic acid	4.74_209.0793m/z		209.079	4.74	0.233	3	10538-49-5	2	M-H	C11H14O4	40.2	17.2	12.3	96.8
3-Hydroxymyristic acid	7.77_243.1958m/z		243.196	7.77	0.194	2	1961-72-4	2	M-H	C14H28O3	43.2	23	3.1	96.6
3-Hydroxyoctadecanoic Acid	8.66_299.2588m/z		299.259	8.66	0.505	1	17773-30-7	2	M-H	C18H36O3	42.2	12.7	1.1	99.6
3-Hydroxyoctanoic acid	5.23_159.1023m/z		159.102	5.23	0.155	3	14292-27-4	2	M-H	C8H16O3	47.3	42	2.2	97.3
3-Phenoxypropionic acid	4.45_166.0626n	166.063	165.055	4.45	0.156	8	7170-38-9	2	M-H2O-H, M-H	C9H10O3	41.8	14.1	2.3	97.8
4-(2-Hydroxyethyl)piperazine-1-ethanesulfonic acid	1.63_237.0878m/z		237.088	1.63	0.126	7	7365-45-9	2	M-H	C8H18N2O4S	41.3	30	15.4	92.6
4-Benzyloxy-2'-hydroxy-3,4',6'-trimethoxychalcone	3.91_419.1536m/z		419.154	3.91	0.129	3	114021-61-3	2	M-H	C25H24O6	40.2	15.1	8.5	95.1
4-Hydroxynonenal	4.99_155.1073m/z		155.107	4.99	0.182	1	75899-68-2	2	M-H	C9H16O2	40.1	5.38	3	98.6
4-Methoxyphenylacetic acid	4.27_165.0579m/z		165.058	4.27	0.13	9	104-01-8	2	M-H	C9H10O3	42.8	32.5	12.9	94.9
4-Vinylphenol, sulfate	3.42_199.0066m/z		199.007	3.42	0.154	2	131351-90-1	2	M-H	C8H8O4S	40.1	11.3	2.1	91.5
5,6-Dehydroarachidonic acid	9.04_301.2167m/z		301.217	9.04	0.192	24	58688-54-3	2	M-H	C20H30O2	50.3	54.8	1.9	98.8
5-Aminosalicylic acid	2.25_152.0347m/z		152.035	2.25	0.123	3	89-57-6	2	M-H	C7H7NO3	45.6	39.4	3.9	93.2
5S,6R-Dihydroxy-7E,9E,11Z,14Z-eicosatetraenoic acid	6.68_335.2217m/z		335.222	6.68	0.69	42	82948-88-7	2	M-H	C20H32O4	44.2	30.7	3.2	94.1
5S-Hydroxy-6E,8Z,11Z-eicosatrienoic acid	8.20_321.2426m/z		321.243	8.2	0.498	11	195061-94-0	2	M-H	C20H34O3	50.3	59.4	2.7	95.6
7(S),17(S)-Dihydroxy-8(E),10(Z),13(Z),15(E),19(Z)-docosapentaenoic Acid	7.05_361.2379m/z		361.238	7.05	0.785	8	887752-13-8	2	M-H	C22H34O4	42.5	22.3	1.4	92.1
7-Keto-8-aminopelargonic acid	4.66_187.1205n	187.12	186.113	4.66	0.468	1	4707-58-8	2	M-H2O-H, M-H	C9H17NO3	40.9	7.75	1.6	98.9
8,9-EE-(14Z)-E	9.09_323.2586m/z		323.259	9.09	1.108	5	Q7EE4omkqUnZKSF	2	M-H	C20H36O3	42.6	23.2	1.8	92
8-Iso-16-cyclohexyl-tetranor prostaglandin E2	6.23_378.2398n	378.24	377.233	6.23	0.771	1	53319-30-5	2	M-H2O-H, M-H	C22H34O5	41.8	18.3	2.3	93.2
9(S)-HpOTrE	7.51_309.2064m/z		309.206	7.51	0.862	2	111004-08-1	2	M-H	C18H30O4	50.2	57	2.3	97
9,12-Octadecadiynoic Acid	7.49_275.2011m/z		275.201	7.49	0.483	10	2012-14-8	2	M-H	C18H28O2	44.4	27.3	2	96.9
9-Hydroxy-10E,12Z-octadecadienoic acid	8.54_295.2276m/z		295.228	8.54	1.054	8	98524-19-7	2	M-H	C18H32O3	42.8	17.1	0.7	97.7
9-Oxo-15S-hydroxy-10Z,13E-prostadienoic acid-cyclo[8S,12S]	7.05_335.2214m/z		335.221	7.05	0.54	42	211186-29-7	2	M-H	C20H32O4	44.6	32.5	4	95.1
9-OxoOTrE	7.60_291.1960m/z		291.196	7.6	0.672	6	125559-74-2	2	M-H	C18H28O3	41.7	13.5	1.8	96.9
9-Oxo-prosta-10,12Z,14E-trienoic acid	8.56_317.2099m/z		317.21	8.56	0.814	40	573951-20-9	2	M-H	C20H30O3	41.2	22.1	7.4	92.4
9S,11R,15S-Trihydroxy-13E-prostaenoic acid	6.18_355.2484m/z		355.248	6.18	0.644	3	745-62-0	2	M-H	C20H36O5	40.7	30.1	1.8	75.6
9S,11R,15S-Trihydroxy-20a,20b-dihomo-5Z,13E-prostadienoic acid	5.98_381.2638m/z		381.264	5.98	0.2	13	36950-85-3	2	M-H	C22H38O5	40.1	7.68	2.2	95.4
9S,11R-Epidioxy-15S-hydroxy-13E-prostaenoic acid	6.06_353.2320m/z		353.232	6.06	0.619	18	52589-22-7	2	M-H	C20H34O5	41.8	27.6	3.7	85.7
9S,15S-Dihydroxy-5Z,13E-prostadienoic acid	7.27_337.2372m/z		337.237	7.27	0.464	16	37786-06-4	2	M-H	C20H34O4	42	19.4	3.7	95
9S-Hydroxy-10E,12Z,15Z-octadecatrienoic acid	8.25_293.2117m/z		293.212	8.25	0.308	9	89886-42-0	2	M-H	C18H30O3	44.4	26.7	1.7	97.3
Azelaic acid	4.74_188.1049n	188.105	187.098	4.74	0.727	3	123-99-9	1	M-H2O-H, M-H	C9H16O4	55.7	80.2	0	98.4
Butanedioic acid, 2-(4,4-dimethyl-2-methylenepentyl)-	5.53_227.1283m/z		227.128	5.53	0.554	2	5703-15-1	2	M-H	C12H20O4	45.2	31	2.6	97.9
Carbocyclic thromboxane A2	8.61_347.2586m/z		347.259	8.61	0.888	2	74034-56-3	2	M-H	C22H36O3	49.3	49.4	1.5	98.8
Cholic acid	6.31_407.2798m/z		407.28	6.31	0.149	5	81-25-4	2	M-H	C24H40O5	45.4	31.6	1.3	96.9
cis-4,10,13,16-Docosatetraenoic acid	9.93_331.2636m/z		331.264	9.93	0.191	4	122068-08-0	2	M-H	C22H36O2	44.3	27	1.8	96.9
cis-4,7,10,13,16,19-Docosahexaenoic acid	9.28_327.2319m/z		327.232	9.28	0.168	2	6217-54-5	2	M-H	C22H32O2	46.4	39.1	3.3	96.7
cis-5,8,11,14-Eicosatetraenoic acid	8.18_303.2321m/z		303.232	8.18	0.427	9	506-32-1	2	M-H	C20H32O2	44.5	33.5	2.9	92.2
Conjugated linoleic Acid (10E,12Z)	9.60_279.2325m/z		279.233	9.6	0.265	4	2420-56-6	2	M-H	C18H32O2	43.1	19.5	1.6	98
Cresotinic acid	4.24_151.0394m/z		151.039	4.24	0.13	20	83-40-9	2	M-H	C8H8O3	53.5	74	4.1	98.3
DL-Phenylalanine	2.18_164.0716m/z		164.072	2.18	0.271	8	150-30-1	2	M-H	C9H11NO2	58	91.7	0.7	99.2
D-Quinovose	1.71_163.0607m/z		163.061	1.71	0.124	6	7658-08-04	2	M-H	C6H12O5	41.9	16.9	2.8	95.8
Geranyl pyrophosphate	4.53_313.0601m/z		313.06	4.53	0.131	8	763-10-0	2	M-H	C10H20O7P2	40.8	17.7	3.5	90.3
Hexadecanedioic acid	7.60_285.2066m/z		285.207	7.6	0.457	1	505-54-4	2	M-H	C16H30O4	51.7	64.5	1.8	96.2
Indole-3-pyruvic acid	1.31_202.0475m/z		202.048	1.31	0.203	4	392-12-1	2	M-H	C11H9NO3	42.6	33.9	16.9	96.2
Leukotriene B3	8.13_337.2375m/z		337.238	8.13	0.238	14	88099-35-8	2	M-H	C20H34O4	42.7	32.5	2.7	84.3
L-Glutamic acid	1.00_146.0453m/z		146.045	1	0.146	6	56-86-0	1	M-H	C5H9NO4	57.9	96.7	3.9	97.3
L-Leucine	1.53_130.0871m/z		130.087	1.53	0.304	8	61-90-5	2	M-H	C6H13NO2	41.3	9.64	1.7	98.8
L-Tryptophan	3.26_203.0823m/z		203.082	3.26	0.155	7	73-22-3	2	M-H	C11H12N2O2	53.3	69.1	1.6	99.4
L-Tyrosine	1.31_180.0665m/z		180.066	1.31	0.178	5	60-18-4	1	M-H	C9H11NO3	52.1	62.1	0.7	99.1
Mevalonic acid	1.93_147.0660m/z		147.066	1.93	0.148	2	150-97-0	2	M-H	C6H12O4	42.5	19.6	1.8	95.2
Myriocin	5.41_400.2691m/z		400.269	5.41	0.206	6	35891-70-4	2	M-H	C21H39NO6	40.8	15	3.5	93.3
Myristoleic acid	8.75_225.1854m/z		225.185	8.75	0.243	3	544-64-9	2	M-H	C14H26O2	41.1	10.7	2.8	98.3
Myristyl sulfate	9.93_293.1776m/z		293.178	9.93	0.576	4	4754-44-3	2	M-H	C14H30O4S	44.4	35.9	5.5	92.3
Nalpha-Acetyl-L-lysine	2.81_187.1084m/z		187.108	2.81	0.17	8	1946-82-3	2	M-H	C8H16N2O3	41.8	12.4	2.1	99
N-[Tris(hydroxymethyl)methyl]-3-amino-2-hydroxypropanesulfonic acid	4.63_258.0656m/z		258.066	4.63	0.131	4	68399-81-5	2	M-H	C7H17NO7S	46.3	41.3	1	91.6
N-Butyryl-DL-homoserine lactone	3.32_170.0818m/z		170.082	3.32	0.155	5	98426-48-3	2	M-H	C8H13NO3	40.2	5.71	2.8	98.7
Pantothenic acid	2.76_218.1029m/z		218.103	2.76	0.195	3	599-54-2	2	M-H	C9H17NO5	40.2	5.18	2.2	98.2
p-Hydroxyphenyllactic acid	3.34_182.0575n	182.058	181.05	3.34	0.129	8	306-23-0	2	M-H2O-H, M-H	C9H10O4	44.9	28.5	2.1	98.5
Pinolenic acid	9.14_277.2169m/z		277.217	9.14	0.311	11	16833-54-8	2	M-H	C18H30O2	44.4	26.4	1.3	97.1
Porphobilinogen	2.57_225.0876m/z		225.088	2.57	0.244	5	487-90-1	2	M-H	C10H14N2O4	41.6	17.9	2.2	92.8
Prostaglandin I3	5.66_349.2005m/z		349.2	5.66	0.821	26	68794-57-0	2	M-H	C20H30O5	43	32.6	4.4	87.3
p-Toluenesulfonic acid	3.37_171.0117m/z		171.012	3.37	0.231	3	104-15-4	2	M-H	C7H8O3S	41.1	15.6	2.8	93.5
Ricinoleic acid	8.32_297.2433m/z		297.243	8.32	1.173	1	141-22-0	2	M-H	C18H34O3	48	41.5	0.7	99.3
Salicylic acid	3.60_137.0240m/z		137.024	3.6	0.154	3	69-72-7	2	M-H	C7H6O3	54.7	81.5	3.4	95.9
Sebacic acid	6.21_201.1126m/z		201.113	6.21	0.819	3	111-20-6	2	M-H	C10H18O4	41.6	13.7	3	97.6
Sebacic acid monomethyl ester	5.53_216.1359n	216.136	215.129	5.53	0.255	2	818-88-2	2	M-H2O-H, M-H	C11H20O4	41.1	9.11	1.4	98.2
Taurocholic acid	9.48_514.2776m/z		514.278	9.48	0.217	3	81-24-3	2	M-H	C26H45NO7S	47.8	58.7	13.1	94
Thromboxane B2	5.61_369.2279m/z		369.228	5.61	1.031	17	54397-85-2	2	M-H	C20H34O6	45	33.8	0.9	92.2
trans-2-Hydroxycinnamic acid	1.31_163.0397m/z		163.04	1.31	0.153	15	614-60-8	2	M-H	C9H8O3	43.3	21.9	2.4	97.5
