# Supplementary material for: Extraction and untargeted analysis of metabolome from undemineralised cortical bone matrix
Source: Royal Society of Chemistry journal article supplement (doi:10.1039/d4mo00015c), 2024-07-22
Supplement: d4mo00015c4.xlsx [file d4mo00015c4.xlsx]

## Sheet: RSD HILIC ESI+
class

## Sheet: RSD HILIC ESI-
class

## Sheet: RSD C18 ESI+
class

## Sheet: RSD C18 ESI-
class
